# Supplementary material for: Exploiting adamantane as a versatile organic tecton: multicomponent catalytic cascade reactions
Source: Royal Society of Chemistry journal article supplement (doi:10.1039/c2cc35054h), 2012-01-01
Supplement: c2cc35054h.pdf [file c2cc35054h.pdf]

## **Exploiting Adamantane as a Versatile Organic Tecton: Multicomponent Catalytic Cascade Reactions.**

*Ronald Grigg,<sup>a\*</sup> Elghareeb E. Elboray,<sup>a,b</sup> Moustafa F. Aly<sup>b</sup> and Hussien H. Abbas-Temirek<sup>b</sup>*

<sup>a</sup> School of Chemistry, University of Leeds, Leeds, UK, LS6 9JT.

<sup>b</sup> Department of Chemistry, Faculty of Science at Qena, South Valley University, Qena, Egypt.

r.grigg@leeds.ac.uk

### Table of contents

|                                                                |    |
|----------------------------------------------------------------|----|
| 1. General technical data.....                                 | 2  |
| 2. General Procedure A: N-propargylation.....                  | 2  |
| 3. General Procedure B: allene formation.....                  | 4  |
| 4. General Procedure C: Pd catalysed 3-component cascades..... | 5  |
| 5. General Procedure D: Pd catalysed 9-component cascades..... | 13 |
| 6. References.....                                             | 24 |
| 7. HRMS of 9-component cascade products.....                   | 25 |

### General technical data.

Thin layer chromatography (TLC) was carried out on a pre-coated aluminium plates with silica gel 60 F254 (Merck), and was visualised using ultraviolet light and/or aqueous  $\text{KMnO}_4/\text{I}_2$ . Flash column chromatography employed silica gel 60 (Merck, 230-400mesh). Melting points were determined on a Reichert hot-stage microscope and are uncorrected. Optical rotations were calculated using Polartronic H 532 (Schmidt + Haensch) instrument. Infrared spectra were recorded using a Perkin-Elmer Spectrum FT-IR spectrometer either as a thin film on sodium chloride discs or as a solid using golden gate apparatus. Proton nuclear magnetic resonance spectra were recorded at 500 and 300MHz on a Bruker DRX500 and DPX300 instruments, respectively. Chemical shifts ( $\delta$ ) are reported in parts per million relative to tetramethylsilane ( $\delta = 0.00$ ) and coupling constants are given in hertz (Hz). The following abbreviations are used: s = singlet, br = broad, d = doublet, dd = doublet of doublets, ddd = doublet of double doublets, dt = doublet of triplets, m = multiplet, t = triplet, td = triplet of doublets.  $^{13}\text{C}$ -NMR spectra were recorded at 75 MHz on a Bruker DPX300 instrument and chemical shifts are reported in parts per million (ppm). Mass spectral data were determined at 70 eV on a Micromass ZMD 2000 electrospray (ES) machine. Accurate masses were obtained using a Bruker Daltonics micrOTOF spectrometer. The m/z data mentioned in case of 9-component cascades are the result of two runs using the auto sampler technique and by injecting the sample directly to the machine using a syringe pump.

$^1\text{H}$ -NMR peak assignments are mainly based on DEPT135, COSY, HMQC and HMBC spectral data.

All compounds were named according to the IUPAC system using the ACD/ILAB (ACD/IUPAC v.12.0 programme) web service (<http://www.acdlabs.com>).

### General Procedure A: N-propargylation.

Propargyl bromide (80% solution in toluene, 2 equiv.) was added to a solution of the NH-heterocycle (1 equiv.) and  $\text{K}_2\text{CO}_3$  in dry acetone and the mixture was stirred at room temperature for 16h. The mixture was filtered, the solvent removed under reduced pressure and the residue dissolved in  $\text{CHCl}_3$  (20 mL). The organic layer was washed with water ( $2 \times 10$  mL), dried over anhydrous  $\text{MgSO}_4$ , filtered and the filtrate evaporated under *vacuo* to afford the product.

### 2',3',5'-Tri-*O*-acetyl-3-prop-2-yn-1-yluridine.<sup>1</sup>

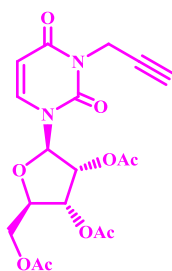

Prepared by general procedure A from 2',3',5'-tri-*O*-acetyluridine. Flash column chromatography eluting with 7:3 v/v EtOAc/*n*-hexane afforded the product as a colourless gum (93%),  $[\alpha]_D +17.1$  (*c*, 35 mg/10 mL CH<sub>2</sub>Cl<sub>2</sub>);  $\delta_H$  (500 MHz, CDCl<sub>3</sub>); 7.41 (1H, d, *J* 8.2, pyrimidinyl 6-H), 6.02 (1H, d, *J* 4.7, ribosyl 1-H), 5.86 (1H, d, *J* 8.2, pyrimidinyl 5-H), 5.38 (1H, dd, *J* 5.9 and 4.7, ribosyl 2-H), 5.35-5.31 (1H, m, ribosyl 3-H), 4.71 (1H, dd, *J* 16.4 and 2.1, NCH<sub>A</sub>C≡), 4.65 (1H, dd, *J* 16.4 and 2.6, NCH<sub>B</sub>C≡), 4.36 (3H, br s, ribosyl 4-H and 5-CH<sub>2</sub>), 2.18 (1H, dd, *J* 2.6 and 2.1, ≡CH), 2.14 (3H, s, OCOMe), 2.12 (3H, s, OCOMe), 2.11 (3H, s, OCOMe);  $\delta_C$  (75 MHz, CDCl<sub>3</sub>); 170.5, 170.1, 170.0, 163.3, 161.5, 150.5, 138.2, 103.1, 89.2, 80.1, 73.3, 71.3, 70.2, 63.2, 30.7, 21.2, 20.9, 20.8;  $\nu_{max}/cm^{-1}$  (film); 2396, 2125, 1747, 1711, 1670, 1456, 1376, 1233; *m/z* (ES, %) 409 (MH<sup>+</sup>, 65).

### 3',5'-Di-*O*-acetyl-3-prop-2-yn-1-ylthymidine.

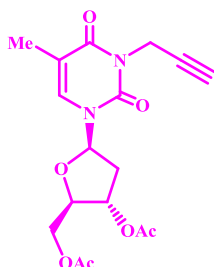

Prepared by general procedure A from 3',5'-di-*O*-acetylthymidine. Flash column chromatography eluting with 2:1 v/v EtOAc/*n*-hexane gave the product as a colourless gum (90%),  $[\alpha]_D -3.2$  (*c*, 10 mg/1 mL CH<sub>2</sub>Cl<sub>2</sub>); (Found: C, 55.90; H, 5.80; N, 7.45; C<sub>17</sub>H<sub>20</sub>N<sub>2</sub>O<sub>7</sub> requires C, 56.04; H, 5.53; N, 7.69%);  $\delta_H$  (500 MHz, CDCl<sub>3</sub>); 7.29 (1H, br s, pyrimidinyl 6-H), 6.37 (1H, dd, *J* 9.1 and 5.9, deoxyribosyl 1-H), 5.22 (1H, dt, *J* 6.6 and 2.1, deoxyribosyl 3-H), 4.72 (2H, d, *J* 2.6, NCH<sub>2</sub>C≡), 4.38-4.34 (2H, m, deoxyribosyl 5-CH<sub>2</sub>), 4.26 (1H, m, deoxyribosyl 4-H), 2.50 (1H, ddd, *J* 14.3, 5.9 and 2.1, deoxyribosyl 2-H<sub>A</sub>), 2.18-2.15 (1H, m, deoxyribosyl 2-H<sub>B</sub>), 2.16 (1H, m, ≡CH), 2.13 (3H, s, OCOMe), 2.11 (3H, s, OCOMe), 1.98 (3H, s, pyrimidinyl 5-Me);  $\delta_C$  (75 MHz, CDCl<sub>3</sub>); 170.7, 170.4, 162.3, 150.2, 147.5, 145.6,

132.9, 85.5, 82.0, 74.0, 70.6, 63.8, 37.6, 30.4, 20.9, 20.8, 13.3;  $\nu_{\max}/\text{cm}^{-1}$  (film); 3272, 2955, 1743, 1707, 1673, 1651, 1466, 1369, 1333, 1234;  $m/z$  (ES, %) 365 ( $\text{MH}^+$ , 100).

### General Procedure B: Allene formation.<sup>2</sup>

A mixture of alkyne (1 equiv.), dicyclohexylamine (1.8 equiv.), paraformaldehyde (2.5 equiv.) and CuI (0.5 equiv.) in dry dioxane was refluxed for 3h. The reaction mixture was cooled and the solvent removed under reduced pressure. The residue was dissolved in  $\text{CHCl}_3$  and the organic layer washed with (10%)  $\text{NH}_4\text{OH}$  three times then with water, dried over anhydrous  $\text{MgSO}_4$ , filtered and the filtrate evaporated under *vacuo* to give the crude allene which was purified by flash column chromatography.

### 1-(Buta-2,3-dien-1-yl)-3,7-dimethyl-3,7-dihydro-1H-purine-2,6-dione (4a).<sup>3</sup>

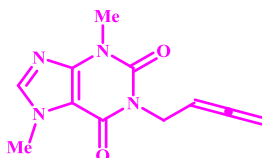

Prepared by general procedure B from 3,7-dimethyl-1-(prop-2-yn-1-yl)-3,7-dihydro-1H-purine-2,6-dione.<sup>4,5</sup> Flash column chromatography eluting with EtOAc gave **4a** as a colourless fine needles (83%), mp. 128-130 °C; (Found: C, 56.70; H, 5.10; N, 24.15;  $\text{C}_{11}\text{H}_{12}\text{N}_4\text{O}_2$  requires C, 56.89; H, 5.21; N, 24.12%);  $\delta_{\text{H}}$  (300 MHz,  $\text{CDCl}_3$ ); 7.53 (1H, s, purine 8-H), 5.36-5.27 (1H, m,  $\text{CH}_2\text{CH}=\text{}$ ), 4.83-4.78 (2H, m,  $\text{NCH}_2\text{CH}=\text{}$ ), 4.65-4.61 (2H, m,  $=\text{CH}_2$ ), 4.00 (3H, s, NMe), 3.58 (3H, s, NMe);  $\delta_{\text{C}}$  (75 MHz,  $\text{CDCl}_3$ ); 208.8, 154.9, 151.2, 148.8, 141.5, 107.6, 86.3, 77.0, 39.5, 33.6, 29.7;  $\nu_{\max}/\text{cm}^{-1}$  (film); 3115, 2950, 1701, 1654, 1598, 1477, 1332;  $m/z$  (ES, %) 233 ( $\text{MH}^+$ , 100).

### 2',3',5'-Tri-O-acetyl-3-buta-2,3-dien-1-yluridine (4b).

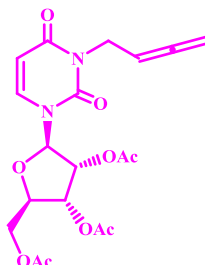

Prepared by general procedure B from 2',3',5'-tri-O-acetyl-3-prop-2-yn-1-yluridine. Flash column chromatography eluting with 2:1 v/v EtOAc/*n*-hexane gave **4b** as a colourless gum

(80%),  $[\alpha]_D + 30.6$  (*c*, 4.2 mg/1 mL CH<sub>2</sub>Cl<sub>2</sub>); (Found: C, 53.85; H, 5.00; N, 6.45; C<sub>19</sub>H<sub>22</sub>N<sub>2</sub>O<sub>9</sub> requires C, 54.03; H, 5.25; N, 6.63%);  $\delta_H$  (500 MHz, CDCl<sub>3</sub>); 7.37 (1H, d, *J* 8.1, pyrimidinyl 6-H), 6.01 (1H, d, *J* 4.3, ribosyl 1-H), 5.82 (1H, d, *J* 8.1, pyrimidinyl 5-H), 5.38 (1H, dd, *J* 5.9 and 4.3, ribosyl 2-H), 5.35-5.31 (1H, m, ribosyl 3-H), 5.29-5.23 (1H, m, CH<sub>2</sub>CH=), 4.83-4.80 (2H, m, NCH<sub>2</sub>CH=), 4.55-4.51 (2H, m, =CH<sub>2</sub>), 4.36 (3H, br s, ribosyl 4-H and 5-CH<sub>2</sub>), 2.15 (3H, s, OCOMe), 2.12 (3H, s, OCOMe), 2.11 (3H, s, OCOMe);  $\delta_C$  (75 MHz, CDCl<sub>3</sub>); 209.2, 170.6, 170.5, 169.9, 162.1, 150.8, 137.8, 103.1, 89.2, 86.0, 80.0, 77.6, 73.3, 71.3, 63.3, 39.6, 21.4, 21.1, 20.8;  $\nu_{\max}/\text{cm}^{-1}$  (film); 2107, 1960, 1746, 1666, 1457, 1423, 1388, 1229; *m/z* (ES, %) 423 (MH<sup>+</sup>, 100).

### 3',5'-Di-*O*-acetyl-3-buta-2,3-dien-1-ylthymidine (4c).

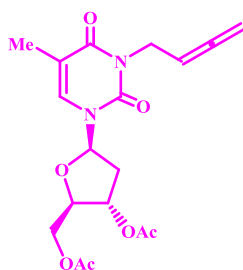

Prepared by general procedure B from 3',5'-di-*O*-acetyl-3-prop-2-yn-1-ylthymidine. Flash column chromatography eluting with 1:1 v/v EtOAc/*n*-hexane gave **4c** as a colourless gum (75%),  $[\alpha]_D + 17.0$  (*c*, 10 mg/1 mL CH<sub>2</sub>Cl<sub>2</sub>); (Found: C, 57.05; H, 5.85; N, 7.40; C<sub>18</sub>H<sub>22</sub>N<sub>2</sub>O<sub>7</sub> requires C, 57.14; H, 5.86; N, 7.40%);  $\delta_H$  (500 MHz, CDCl<sub>3</sub>); 7.27 (1H, br s, pyrimidinyl 6-H), 6.35 (1H, dd, *J* 8.6 and 5.6, deoxyribosyl 1-H), 5.27 (1H, tt, *J* 12.8 and 6.4, CH<sub>2</sub>CH=), 5.23-5.21 (1H, m, deoxyribosyl 3-H), 4.80 (2H, dt, *J* 6.4 and 3.0, NCH<sub>2</sub>CH=), 4.56 (2H, dt, *J* 6.4 and 3.0, =CH<sub>2</sub>), 4.36 (2H, d, *J* 3.9, deoxyribosyl 5-CH<sub>2</sub>), 4.25 (1H, dt, *J* 5.9 and 3.9, deoxyribosyl 4-H), 2.49 (1H, ddd, *J* 14.1, 5.6 and 2.0, deoxyribosyl 2-H<sub>A</sub>), 2.18-2.15 (1H, m, deoxyribosyl 2-H<sub>B</sub>), 2.13 (3H, s, OCOMe), 2.11 (3H, s, OCOMe), 1.96 (3H, s, pyrimidinyl 5-Me);  $\delta_C$  (75 MHz, CDCl<sub>3</sub>); 209.5, 170.8, 170.5, 163.1, 150.9, 132.9, 111.0, 86.1, 85.8, 82.4, 77.3, 74.5, 64.2, 39.9, 38.0, 21.4, 21.2, 13.8;  $\nu_{\max}/\text{cm}^{-1}$  (film); 2954, 1957, 1744, 1703, 1671, 1647, 1466, 1367, 1232; *m/z* (ES, %) 379 (MH<sup>+</sup>, 100).

### General Procedure C: Pd catalysed 3-component cascades.

A mixture of substituted allene **4** (1 equiv.), aryl/heteroaryl iodide **5** (1.2 equiv.), 1-aminoadamantane **1** (1.2 equiv.), Pd<sub>2</sub>(dba)<sub>3</sub> (2.5 mol%), TFP (tri-(2-furyl)phosphine) (10 mol%) and K<sub>2</sub>CO<sub>3</sub> (3 equiv.) in MeCN was stirred and heated at 80 °C (oil bath temperature).

The mixture was cooled, filtered and the inorganic precipitate washed with MeCN. The filtrate was evaporated under reduced pressure and the resulting residue dissolved in  $\text{CHCl}_3$  and washed with saturated  $\text{NH}_4\text{Cl}$  and then with saturated  $\text{NaCl}$ . The organic layer was dried with anhydrous  $\text{MgSO}_4$ , filtered, and the filtrate evaporated under reduced pressure. The residue was purified by flash chromatography.

**1-[(2Z)-4-(Adamantan-1-ylamino)-3-(pyridin-3-yl)but-2-en-1-yl]-3,7-dimethyl-3,7-dihydro-1H-purine-2,6-dione (6a).**

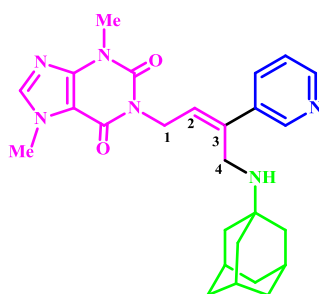

Prepared by general procedure C from **4a** and heating for 5h. Gradient elution chromatography with EtOAc and then 10:1 v/v EtOAc/MeOH gave the product **6a** (78%) as a colourless froth, mp 91-93°C;  $\delta_{\text{H}}$  (300 MHz,  $\text{CDCl}_3$ ); 8.77 (1H, d,  $J$  1.5, pyridyl-H), 8.45 (1H, dd,  $J$  4.9 and 1.5, pyridyl-H), 7.87 (1H, dt,  $J$  8.0 and 1.5, pyridyl-H), 7.55 (1H, s, purine-H), 7.21 (1H, ddd,  $J$  8.0, 4.9 and 0.5, pyridinyl-H), 5.90 (1H, t,  $J$  7.1,  $\text{NCH}_2\text{CH}=\text{}$ ), 4.90 (2H, d,  $J$  7.1,  $\text{NCH}_2\text{CH}=\text{}$ ), 4.00 (3H, s, NMe), 3.82 (2H, s,  $=\text{CCH}_2\text{N}$ ), 3.59 (3H, s, NMe), 2.10 (3H, br s, 3  $\times$  adamantyl-CH), 1.78 (6H, d,  $J$  2.3, 3  $\times$  adamantyl- $\text{CH}_2$ ), 1.67 (6H, br s, 3  $\times$  adamantyl- $\text{CH}_2$ );  $\delta_{\text{C}}$  (75 MHz,  $\text{CDCl}_3$ ); 155.4, 151.7, 149.3, 148.7, 148.1, 142.0, 139.6, 137.5, 134.1, 126.1, 123.4, 108.0, 51.4, 42.9, 39.9, 39.6, 37.2, 34.0, 30.2, 30.0;  $\nu_{\text{max}}/\text{cm}^{-1}$  (film); 2906, 2848, 1704, 1661, 1550, 1455, 1358, 1310, 1234;  $m/z$  (ESI<sup>+</sup>) 461.3 (100%,  $\text{MH}^+$ ); (Found  $\text{MH}^+$ , 461.2675.  $\text{C}_{26}\text{H}_{33}\text{N}_6\text{O}_2$  requires  $\text{MH}$ , 461.2660).

NOE data ( $\text{CDCl}_3$ ) for **6a**:

| Irradiated proton | % Enhancement |     |     |                                              |                                           |
|-------------------|---------------|-----|-----|----------------------------------------------|-------------------------------------------|
|                   | 1-H           | 2-H | 4-H | Pyridyl-H                                    | adamantyl- $\text{CH}_2$ ( $\delta$ 1.74) |
| 1-H               |               | 6.8 | 3.6 | -                                            | -                                         |
| 2-H               | 3.2           |     | -   | 8.4 ( $\delta$ 8.77)<br>6.1 ( $\delta$ 7.87) | -                                         |
| 4-H               | 4.3           | -   |     | 4.4 ( $\delta$ 8.77)<br>3.6 ( $\delta$ 7.87) | 6.8                                       |

**1-[(2*E*)-4-(Adamantan-1-ylamino)-3-(2-thienyl)but-2-en-1-yl]-3,7-dimethyl-3,7-dihydro-1*H*-purine-2,6-dione (6b).**

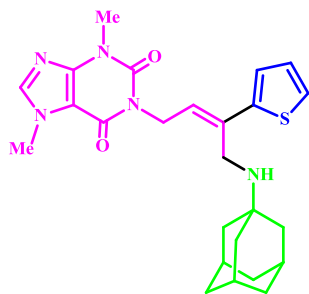

Prepared by general procedure C from **4a** and heating for 2h. Flash chromatography eluting with EtOAc gave the product **6b** (69%) as a colourless froth, mp 155-157°C;  $\delta_{\text{H}}$  (300 MHz,  $\text{CDCl}_3$ ); 7.50 (1H, s, purine-H), 7.17 (1H, dd,  $J$  3.6 and 1.0, thienyl-H), 7.11 (1H, dd,  $J$  5.1 and 1.0, thienyl-H), 6.93 (1H, dd,  $J$  5.1 and 3.6, thienyl-H), 5.97 (1H, t,  $J$  7.2,  $\text{NCH}_2\text{CH}=\text{}$ ), 4.85 (2H, d,  $J$  7.2,  $\text{NCH}_2\text{CH}=\text{}$ ), 3.98 (3H, s, NMe), 3.81 (2H, s,  $=\text{CCH}_2\text{N}$ ), 3.57 (3H, s, NMe), 2.11 (3H, br s, 3  $\times$  adamantyl-CH), 1.80 (6H, d,  $J$  2.6, 3  $\times$  adamantyl- $\text{CH}_2$ ), 1.68 (6H, d,  $J$  2.1, 3  $\times$  adamantyl- $\text{CH}_2$ );  $\delta_{\text{C}}$  (75 MHz,  $\text{CDCl}_3$ ); 154.9, 151.2, 148.7, 145.3, 141.5, 136.4, 127.2, 124.1, 123.8, 122.1, 107.5, 50.9, 42.5, 39.7, 39.2, 36.8, 33.5, 29.7, 29.4;  $\nu_{\text{max}}/\text{cm}^{-1}$  (film); 2903, 2846, 1702, 1660, 1549, 1454, 1361, 1310, 1233;  $m/z$  (ESI<sup>+</sup>) 466.2 (100%,  $\text{MH}^+$ ); (Found  $\text{MH}^+$ , 466.2289.  $\text{C}_{25}\text{H}_{32}\text{N}_5\text{O}_2$   $^{32}\text{S}$  requires  $\text{MH}$ , 466.2271).

**1-[(2*Z*)-4-(Adamantan-1-ylamino)-3-[3-(trifluoromethyl)phenyl]but-2-en-1-yl]-3,7-dimethyl-3,7-dihydro-1*H*-purine-2,6-dione (6c).**

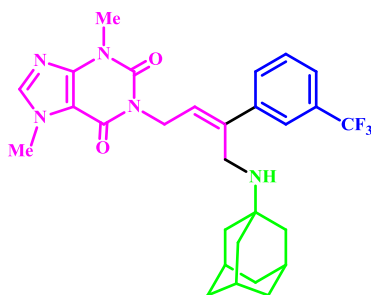

Prepared by general procedure C from **4a** and heating for 2h. Flash chromatography eluting with 30:1 v/v  $\text{CHCl}_3/\text{MeOH}$  gave the product **6c** (91%) as a colourless froth, mp 68-70°C;  $\delta_{\text{H}}$  (300 MHz,  $\text{CDCl}_3$ ); 7.86 (1H, s, phenyl-H), 7.75 (1H, d,  $J$  7.7, phenyl-H), 7.52 (1H, s, purine-H), 7.47 (1H, d,  $J$  7.7, phenyl-H), 7.39 (1H, t,  $J$  7.7, phenyl-H), 5.90 (1H, t,  $J$  7.1,  $\text{NCH}_2\text{CH}=\text{}$ ), 4.90 (2H, d,  $J$  7.1,  $\text{NCH}_2\text{CH}=\text{}$ ), 3.99 (3H, s, NMe), 3.82 (2H, s,  $=\text{CCH}_2\text{N}$ ), 3.59 (3H, s, NMe), 2.11 (3H, br s, 3  $\times$  adamantyl-CH), 1.79 (6H, br d,  $J$  2.2, 3  $\times$  adamantyl- $\text{CH}_2$ ),

1.68 (6H, br d,  $J$  1.6, 3 × adamantyl-CH<sub>2</sub>);  $\delta_c$  (75 MHz, CDCl<sub>3</sub>); 155.0, 151.4, 148.9, 142.5, 141.6, 140.9, 130.4 ( $J$  32.1), 129.6, 128.6, 125.5, 124.2 ( $J$  272.0), 123.8 ( $J$  4.4), 123.2 ( $J$  4.4), 107.6, 50.9, 42.5, 39.6, 39.4, 36.8, 33.6, 29.8, 29.7;  $\nu_{\max}/\text{cm}^{-1}$  (film); 3310, 2907, 2849, 1702, 1661, 1604, 1550, 1487, 1455, 1415, 1334, 1258, 1234;  $m/z$  (ESI<sup>+</sup>) 528.3 (100%, MH<sup>+</sup>); (Found MH<sup>+</sup>, 528.2575. C<sub>28</sub>H<sub>33</sub>F<sub>3</sub>N<sub>5</sub>O<sub>2</sub> requires  $MH$ , 528.2581).

**2',3',5'-Tri-*O*-acetyl-3-[(2*Z*)-4-(adamantan-1-ylamino)-3-[3,5-bis(trifluoromethyl)phenyl]but-2-en-1-yl]uridine (6d).**

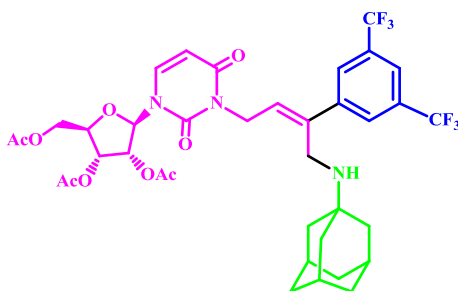

Prepared by general procedure C from **4b** and heating for 5h. Flash column chromatography eluting with 1:1 v/v EtOAc/*n*-hexane gave the product **6d** (77%) as a pale yellow gum;  $[\alpha]_D + 19.5$  (*c*, 16 mg/1 mL CHCl<sub>3</sub>);  $\delta_H$  (300 MHz, CDCl<sub>3</sub>); 8.00 (2H, s, 2 × phenyl-H), 7.61 (1H, s, phenyl-H), 7.33 (1H, d,  $J$  8.2, pyrimidinyl 6-H), 5.91 (1H, d,  $J$  4.9, ribosyl 1-H), 5.78 (1H, t,  $J$  7.1, NCH<sub>2</sub>CH=), 5.74 (1H, d,  $J$  8.2, pyrimidinyl 5-H), 5.28 (1H, dd,  $J$  6.0 and 4.9, ribosyl 2-H), 5.23-5.19 (1H, m, ribosyl 3-H), 4.69 (2H, d,  $J$  7.1, NCH<sub>2</sub>CH=), 4.24 (3H, s, ribosyl 4-H and 5-CH<sub>2</sub>), 3.62 (2H, s, =CCH<sub>2</sub>N), 2.00 (9H, s, 2 × OCOMe and 3 × adamantyl-CH), 1.96 (3H, s, OCOMe), 1.64 (6H, br d,  $J$  2.2, 3 × adamantyl-CH<sub>2</sub>), 1.56 (6H, br s, 3 × adamantyl-CH<sub>2</sub>);  $\delta_c$  (75 MHz, CDCl<sub>3</sub>); 170.1 (CO), 169.5 (2 × CO), 161.9, 150.7, 144.0, 140.3, 137.5, 131.2 (q,  $J$  33.2), 126.6 (brd,  $J$  3.3), 125.9, 123.5 (q,  $J$  237.1), 120.7 (q,  $J$  3.9), 102.7, 88.7, 79.7, 73.0, 69.9, 62.8, 50.8, 42.5, 39.5, 39.4, 36.7, 29.6, 20.7, 20.4, 20.3;  $\nu_{\max}/\text{cm}^{-1}$  (film); 3313, 3023, 2908, 2850, 1755, 1713, 1668, 1455, 1383, 1310, 1280, 1227;  $m/z$  (ESI<sup>+</sup>) 786.3 (100%, MH<sup>+</sup>); (Found MH<sup>+</sup>, 786.2941. C<sub>37</sub>H<sub>41</sub>F<sub>6</sub>N<sub>3</sub>O<sub>9</sub> requires  $MH$ , 786.2820).

**2',3',5'-Tri-*O*-acetyl-3-[(2*Z*)-4-(adamantan-1-ylamino)-3-(3-chloro-4-fluorophenyl)but-2-en-1-yl]uridine (6e).**



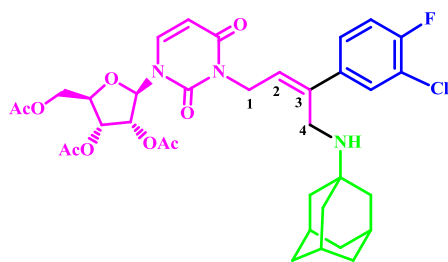

Prepared by general procedure C from **4b** and heating for 4h. Flash chromatography eluting with 1:1 v/v EtOAc/*n*-hexane gave the product **6e** (86%) as a pale yellow gum;  $[\alpha]_D + 19.7$  (*c*, 14 mg/1 mL CHCl<sub>3</sub>);  $\delta_H$  (300 MHz, CDCl<sub>3</sub>); 7.62 (1H, dd, *J* 7.1 and 2.2, phenyl-H), 7.44-7.39 (1H, m, phenyl-H), 7.40 (1H, d, *J* 8.2, pyrimidinyl 6-H), 7.05 (1H, t, *J* 8.5, phenyl-H), 6.00 (1H, d, *J* 4.4, ribosyl 1-H), 5.84 (1H, d, *J* 8.2, pyrimidinyl 5-H), 5.74 (1H, t, *J* 7.1, NCH<sub>2</sub>CH=), 5.39 (1H, dd, *J* 5.5 and 4.4, ribosyl 2-H), 5.34-5.33 (1H, m, ribosyl 3-H), 4.75 (2H, d, *J* 7.1, NCH<sub>2</sub>CH=), 4.35 (3H, s, ribosyl 4-H and 5-CH<sub>2</sub>), 3.70 (2H, s, =CCH<sub>2</sub>N), 2.13 (3H, s, OCOMe), 2.12 (3H, s, OCOMe), 2.10 (6H, s, OCOMe and 3 × adamantyl-CH), 1.74 (6H, br d, *J* 2.2, 3 × adamantyl-CH<sub>2</sub>), 1.67 (6H, br s, 3 × adamantyl-CH<sub>2</sub>);  $\delta_C$  (75 MHz, CDCl<sub>3</sub>); 170.1 (CO), 169.6 (2 × CO), 162.0, 157.5 (*J* 248.8), 150.7, 140.8, 139 (*J* 4.4), 137.4, 128.6, 126.1 (*J* 6.6), 123.9, 120.5 (*J* 17.7), 116.1 (*J* 21.0), 102.8, 88.8, 79.7, 73.0, 69.9, 62.8, 50.8, 42.5, 39.54, 39.51, 36.8, 29.6, 20.8, 20.5, 20.4;  $\nu_{\max}/\text{cm}^{-1}$  (film); 3312, 2906, 2849, 1751, 1711, 1668, 1497, 1455, 1386, 1310, 1228; *m/z* (ESI<sup>+</sup>) 702.3 (100%, MH<sup>+</sup>); (Found MH<sup>+</sup>, 702.2606. C<sub>35</sub>H<sub>42</sub>ClFN<sub>3</sub>O<sub>9</sub> requires *MH*, 702.2588).

NOE data (CDCl<sub>3</sub>) for **6e**:

| Irradiated proton | % Enhancement |     |     |                                              |                                            |
|-------------------|---------------|-----|-----|----------------------------------------------|--------------------------------------------|
|                   | 1-H           | 2-H | 4-H | phenyl-H                                     | adamantyl-CH <sub>2</sub> ( $\delta$ 1.74) |
| 1-H               |               | 6.8 | 4.0 | -                                            | -                                          |
| 2-H               | 3.7           |     | -   | 8.3 ( $\delta$ 7.62)<br>6.6 ( $\delta$ 7.41) | -                                          |
| 4-H               | 4.1           | -   |     | 4.3 ( $\delta$ 7.62)<br>3.3 ( $\delta$ 7.41) | 5.8                                        |

**2',3',5'-Tri-*O*-acetyl-3-[(*ZZ*)-4-(adamantan-1-ylamino)-3-(4-methylphenyl)but-2-en-1-yl]uridine (6f).**

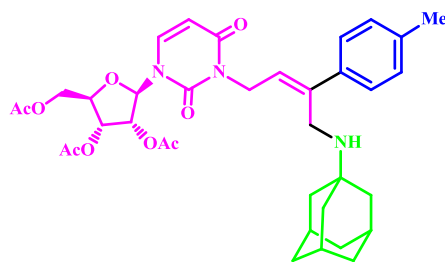

Prepared by general procedure C from **4b** and heating for 3h. Flash chromatography eluting with 1:1 v/v EtOAc/*n*-hexane gave the product **6f** (87%) as a pale yellow gum;  $[\alpha]_D + 19.0$  (*c*, 11 mg/1 mL CHCl<sub>3</sub>);  $\delta_H$  (300 MHz, CDCl<sub>3</sub>); 7.38 (2H, d, *J* 8.2, 2 × phenyl-H), 7.37 (1H, d, *J* 8.2, pyrimidinyl 6-H), 7.10 (2H, d, *J* 7.7, 2 × phenyl-H), 6.02 (1H, d, *J* 4.9, ribosyl 1-H), 5.82 (1H, d, *J* 8.2, pyrimidinyl 5-H), 5.76 (1H, t, *J* 7.1, NCH<sub>2</sub>CH=), 5.37 (1H, dd, *J* 6.0 and 4.9, ribosyl 2-H), 5.35-5.31 (1H, m, ribosyl 3-H), 4.77 (2H, d, *J* 7.1, NCH<sub>2</sub>CH=), 4.34 (3H, s, ribosyl 4-H and 5-CH<sub>2</sub>), 3.79 (2H, s, =CCH<sub>2</sub>N), 2.32 (3H, s, phenyl-Me), 2.13 (3H, s, OCOMe), 2.11 (3H, s, OCOMe), 2.08 (6H, s, OCOMe and 3 × adamantyl-CH), 1.73 (6H, br d, *J* 2.2, 3 × adamantyl-CH<sub>2</sub>), 1.66 (6H, br d, *J* 2.2, 3 × adamantyl-CH<sub>2</sub>);  $\delta_C$  (75 MHz, CDCl<sub>3</sub>); 170.1 (CO), 169.6 (2 × CO), 162.0, 150.7, 142.7, 138.4, 137.3, 137.1, 129.0, 126.2, 122.3, 102.9, 88.5, 79.6, 72.9, 69.9, 62.9, 50.8, 42.5, 39.8, 39.2, 36.8, 29.7, 21.1, 20.8, 20.5, 20.4;  $\nu_{max}/cm^{-1}$  (film); 3313, 3022, 2906, 2849, 1748, 1712, 1668, 1511, 1455, 1371, 1310, 1228; *m/z* (ESI<sup>+</sup>) 664.3 (100%, MH<sup>+</sup>); (Found MH<sup>+</sup>, 664.3252. C<sub>36</sub>H<sub>46</sub>N<sub>3</sub>O<sub>9</sub> requires *MH*, 664.3229).

**3',5'-Di-*O*-acetyl-3-[(*Z*)-4-(adamantan-1-ylamino)-3-phenylbut-2-en-1-yl]thymidine (6g).**

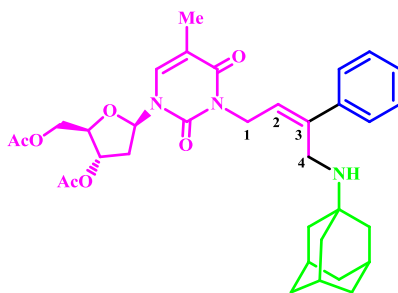

Prepared by general procedure C from **4c** and heating for 3h. Flash chromatography eluting with 1:1 v/v EtOAc/*n*-hexane gave the product **6g** (99%) as a pale yellow gum;  $[\alpha]_D + 5.2$  (*c*, 12 mg/1 mL CHCl<sub>3</sub>);  $\delta_H$  (300 MHz, CDCl<sub>3</sub>); 7.50 (2H, dd, *J* 8.0 and 1.4, 2 × phenyl-H), 7.31-7.22 (3H, m, 3 × phenyl-H and pyrimidinyl 6-H), 6.37 (1H, dd, *J* 8.5 and 5.8, deoxyribosyl 1-H), 5.82 (1H, t, *J* 7.1, NCH<sub>2</sub>CH=), 5.21 (1H, dt, *J* 6.6 and 2.2, deoxyribosyl 3-H), 4.82 (2H,

d,  $J$  7.1,  $\text{NCH}_2\text{CH}=\text{}$ ), 4.38 (1H, dd,  $J$  12.1 and 3.8, deoxyribose 5- $\text{H}_\text{A}$ ), 4.32 (1H, dd,  $J$  12.1 and 3.8, deoxyribose 5- $\text{H}_\text{B}$ ), 4.24 (1H, dt,  $J$  6.6 and 3.8, deoxyribose 4-H), 3.83 (2H, s,  $=\text{CCH}_2\text{N}$ ), 2.48 (1H, ddd,  $J$  13.7, 5.5 and 1.6, deoxyribose 2- $\text{H}_\text{A}$ ), 2.20-2.08 (1H, ddd,  $J$  13.7, 5.5 and 1.6, deoxyribose 5- $\text{H}_\text{B}$ ), 2.12 (3H, s, OCOMe), 2.10 (3H, s, OCOMe), 2.09 (3H, s, 3  $\times$  adamantyl-CH), 1.95 (3H, s, pyrimidinyl 5-Me), 1.74 (6H, br d,  $J$  2.2, 3  $\times$  adamantyl- $\text{CH}_2$ ), 1.66 (6H, br d,  $J$  2.2, 3  $\times$  adamantyl- $\text{CH}_2$ );  $\delta_\text{c}$  (75 MHz,  $\text{CDCl}_3$ ); 170.4, 170.2, 162.9, 150.7, 142.6, 141.4, 132.6, 128.3, 127.4, 126.3, 123.5, 110.8, 85.4, 82.0, 74.1, 63.9, 50.9, 42.6, 39.9, 39.3, 37.6, 36.8, 29.7, 20.9, 20.8, 13.5;  $\nu_{\text{max}}/\text{cm}^{-1}$  (film); 3312, 3020, 2906, 2848, 1747, 1704, 1668, 1644, 1464, 1367, 1310, 1233;  $m/z$  ( $\text{ESI}^+$ ) 606.3 (100%,  $\text{MH}^+$ ); (Found  $\text{MH}^+$ , 606.3194.  $\text{C}_{34}\text{H}_{44}\text{N}_3\text{O}_7$  requires  $\text{MH}$ , 606.3174).

NOE data ( $\text{CDCl}_3$ ) for **6g**:

| Irradiated proton | % Enhancement |     |     |                           |                                           |
|-------------------|---------------|-----|-----|---------------------------|-------------------------------------------|
|                   | 1-H           | 2-H | 4-H | phenyl-H ( $\delta$ 7.50) | adamantyl- $\text{CH}_2$ ( $\delta$ 1.74) |
| 1-H               |               | 5.8 | 3.6 | -                         | -                                         |
| 2-H               | 4.3           |     | -   | 11.9                      | -                                         |
| 4-H               | 4.3           | -   |     | 6.8                       | 7.0                                       |

**3',5'-Di-*O*-acetyl-3-[(2*Z*)-4-(adamantan-1-ylamino)-3-[4-(methoxycarbonyl)phenyl]but-2-en-1-yl]thymidine (6h).**

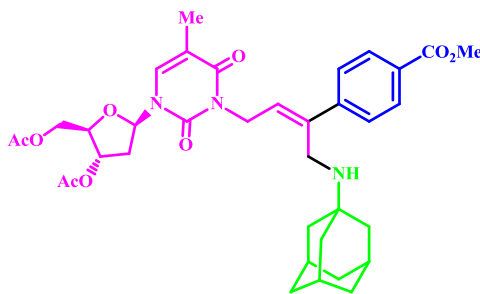

Prepared by general procedure C from **4c** and heating for 4h. Flash chromatography eluting with 1:1 v/v EtOAc/*n*-hexane gave the product **6h** (93%) as a pale yellow gum;  $[\alpha]_\text{D} + 7.6$  (*c*, 13 mg/1 mL  $\text{CHCl}_3$ );  $\delta_\text{H}$  (300 MHz,  $\text{CDCl}_3$ ); 7.96 (2H, d,  $J$  8.5, 2  $\times$  phenyl-H), 7.59 (2H, d,  $J$  8.5, 2  $\times$  phenyl-H), 7.29 (1H, s, pyrimidinyl 6-H), 6.38 (1H, dd,  $J$  5.8 and 8.5, deoxyribose 1-H), 5.90 (1H, t,  $J$  7.1,  $\text{NCH}_2\text{CH}=\text{}$ ), 5.22 (1H, dt,  $J$  6.6 and 2.2, deoxyribose 3-H), 4.83 (2H, d,  $J$  7.1,  $\text{NCH}_2\text{CH}=\text{}$ ), 4.39 (1H, dd,  $J$  4.4 and 12.1, deoxyribose 5- $\text{H}_\text{A}$ ), 4.33 (1H, dd,  $J$  3.3 and 12.1, deoxyribose 5- $\text{H}_\text{B}$ ), 4.25 (1H, dt,  $J$  3.6 and 6.3, deoxyribose 4-H), 3.89 (3H, s,  $\text{CO}_2\text{Me}$ ), 3.81 (2H, s,  $=\text{CCH}_2\text{N}$ ), 2.49 (1H, ddd,  $J$  1.6, 5.5 and 13.7, deoxyribose 2- $\text{H}_\text{A}$ ), 2.20

(1H, ddd, *J* 1.6, 6.6 and 13.7, deoxyribosyl 2-H<sub>B</sub>), 2.12 (3H, s, OCOMe), 2.11 (3H, s, OCOMe), 2.10 (3H, s, 3 × adamantyl-CH), 1.96 (3H, s, pyrimidinyl 5-Me), 1.75 (6H, br d, *J* 2.2, 3 × adamantyl-CH<sub>2</sub>), 1.67 (6H, br s, 3 × adamantyl-CH<sub>2</sub>); δ<sub>c</sub> (75 MHz, CDCl<sub>3</sub>); 170.3, 170.1, 166.9, 162.9, 150.6, 146.1, 141.8, 132.8, 129.6, 128.8, 126.3, 125.3, 110.8, 85.4, 82.0, 74.1, 63.8, 52.0, 50.8, 42.5, 39.8, 39.2, 37.5, 36.8, 29.6, 20.9, 20.8, 13.4; ν<sub>max</sub>/cm<sup>-1</sup> (film); 3311, 3018, 2906, 2848, 1746, 1704, 1669, 1645, 1606, 1465, 1366, 1278, 1233; *m/z* (ESI<sup>+</sup>) 664.3 (100%, MH<sup>+</sup>); (Found MH<sup>+</sup>, 664.3239. C<sub>36</sub>H<sub>46</sub>N<sub>3</sub>O<sub>9</sub> requires *MH*, 664.3229).

**3',5'-Di-*O*-acetyl-3-[(2*Z*)-4-(adamantan-1-ylamino)-3-(3,4-dichlorophenyl)but-2-en-1-yl]thymidine (**6i**).**

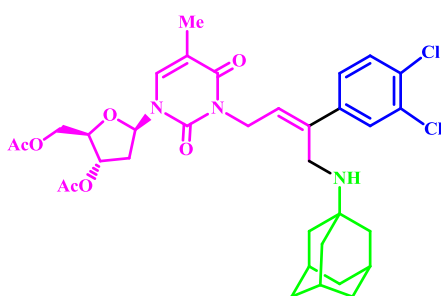

Prepared by general procedure C from **4c** and heating for 2h. Flash chromatography eluting with 1:1 v/v EtOAc/*n*-hexane gave the product **6i** (87%) as a pale yellow gum; [α]<sub>D</sub> + 7.7 (*c*, 11 mg/1 mL CHCl<sub>3</sub>); δ<sub>H</sub> (300 MHz, CDCl<sub>3</sub>); 7.56 (1H, d, *J* 1.6, phenyl-H), 7.28 (1H, dd, *J* 8.2 and 1.6, 2 × phenyl-H), 7.19 (1H, d, *J* 8.2, phenyl-H), 7.18 (1H, s, pyrimidinyl 6-H), 6.27 (1H, dd, *J* 8.2 and 6.0, deoxyribosyl 1-H), 5.70 (1H, t, *J* 7.1, NCH<sub>2</sub>CH=), 5.12 (1H, dt, *J* 6.6 and 2.2, deoxyribosyl 3-H), 4.68 (2H, d, *J* 7.1, NCH<sub>2</sub>CH=), 4.28 (1H, dd, *J* 12.3 and 3.6, deoxyribosyl 5-H<sub>A</sub>), 4.23 (1H, dd, *J* 12.3 and 3.6, deoxyribosyl 5-H<sub>B</sub>), 4.15 (1H, dt, *J* 6.6 and 3.6, deoxyribosyl 4-H), 3.62 (2H, s, =CCH<sub>2</sub>N), 2.38 (1H, ddd, *J* 14.3, 6.6 and 2.2, deoxyribosyl 2-H<sub>A</sub>), 2.09 (1H, ddd, *J* 14.3, 8.2 and 1.6, deoxyribosyl 2-H<sub>B</sub>), 2.02 (3H, s, OCOMe), 2.00 (6H, s, OCOMe and 3 × adamantyl-CH), 1.86 (3H, s, pyrimidinyl 5-Me), 1.64 (6H, br d, *J* 2.2, 3 × adamantyl-CH<sub>2</sub>), 1.56 (6H, br s, 3 × adamantyl-CH<sub>2</sub>); δ<sub>c</sub> (75 MHz, CDCl<sub>3</sub>); 170.3, 170.1, 162.9, 150.6, 141.8, 140.5, 132.8, 132.2, 130.9, 130.0, 128.3, 125.7, 124.8, 110.8, 85.4, 82.0, 74.1, 63.8, 50.9, 42.5, 39.7, 39.3, 37.5, 36.8, 29.6, 20.9, 20.8, 13.4; ν<sub>max</sub>/cm<sup>-1</sup> (film); 3310, 3018, 2906, 2848, 1746, 1702, 1670, 1644, 1550, 1466, 1366, 1336, 1310, 1233; *m/z* (ESI<sup>+</sup>) 674.2 (100%, MH<sup>+</sup>); (Found MH<sup>+</sup>, 674.2410. C<sub>34</sub>H<sub>42</sub>Cl<sub>2</sub>N<sub>3</sub>O<sub>7</sub> requires *MH*, 664.3229).

### General Procedure D: Pd catalysed 9-component cascades.

A mixture of substituted allene **4** (4 equiv.), 1,3,5,7-tetrakis-(4-iodophenyl)adamantane **3** (1 equiv.), nucleophile **7** (4.4 equiv.), Pd<sub>2</sub>(dba)<sub>3</sub> (2.5 mol%), TFP (tri-(2-furyl)phosphine) (10 mol%), and K<sub>2</sub>CO<sub>3</sub> (6 equiv.) in MeCN or DMF was stirred and heated at 80 °C (oil bath temperature) for 3-32h. The mixture was filtered and the inorganic precipitate washed with MeCN. The solvent was removed under reduced pressure, the residue dissolved in CHCl<sub>3</sub> and washed with H<sub>2</sub>O. The organic layer was dried over anhydrous MgSO<sub>4</sub>, filtered, and the filtrate evaporated under reduced pressure. The residue was purified by flash chromatography.

**1,1',1'',1'''-[Tricyclo[3.3.1.1<sup>3,7</sup>]]decane-1,3,5,7-tetrayltetrakis(4,1-phenylene{(2Z)-4-[3-(3-isopropyl-5-methyl-4H-1,2,4-triazol-4-yl)-8-azabicyclo[3.2.1]-oct-8-yl]but-2-ene-3,1-diy})]tetrakis(3,7-dimethyl-3,7-dihydro-1H-purine-2,6-dione) (8a).**

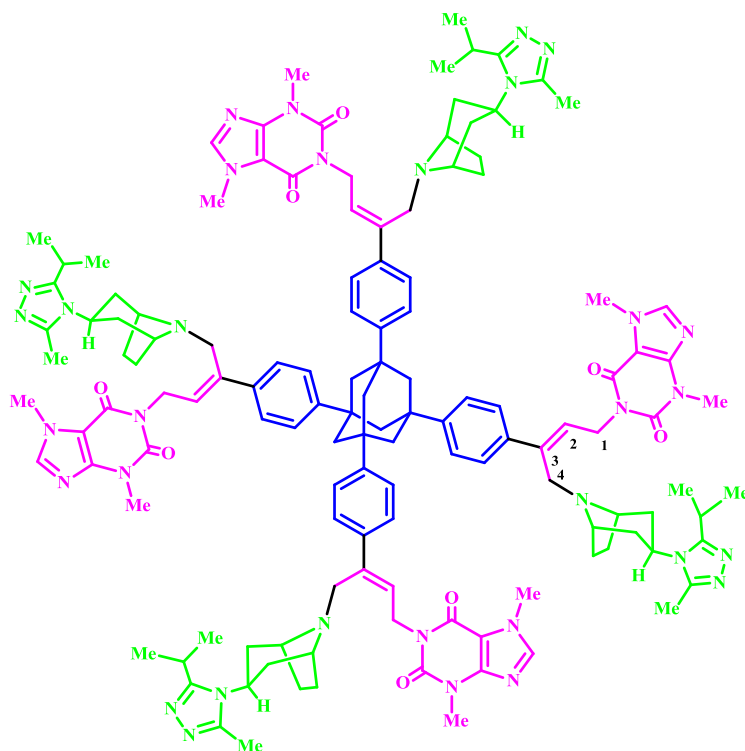

Prepared by general procedure D from **4a** in MeCN and heating for 24h. Flash chromatography gradient eluting with 20:1 v/v CHCl<sub>3</sub>/MeOH then 15:1 v/v CHCl<sub>3</sub>/MeOH gave the product **8a** (52%) as a colourless froth, mp 199-201 °C; δ<sub>H</sub> (300 MHz, CDCl<sub>3</sub>); 7.54 (4H, s, 4 × purine-H), 7.46 (8H, d, *J* 8.2, 8 × phenyl-H), 7.37 (8H, d, *J* 8.2, 8 × phenyl-H), 5.88 (4H, t, *J* 6.2, 4 × NCH<sub>2</sub>CH=), 4.93 (8H, d, *J* 6.2, 4 × NCH<sub>2</sub>CH=), 4.24 (4H, m, 4 × azabicyclooctyl-H), 3.99 (12H, s, 4 × purine-NCH<sub>3</sub>), 3.68 (8H, s, 4 × =CCH<sub>2</sub>N), 3.58 (12H, s,

4 × purine-NCH<sub>3</sub>), 3.46 (8H, br s, 8 × azabicyclooctyl-H), 2.96 (4H, m, 4 × triazolyl 3-CH(CH<sub>3</sub>)<sub>2</sub>), 2.37 (12H, s, 4 × triazolyl 5-CH<sub>3</sub>), 2.21 (8H, br dd, *J* 8.7 and 3.6, 8 × azabicyclooctyl-H), 2.1 (20H, br s, 8 × azabicyclooctyl-H + 6 × adamantyl-CH<sub>2</sub>), 1.66 (16H, br d, *J* 7.7, 16 × azabicyclooctyl-H), 1.32 (24H, d, *J* 6.7, 4 × triazolyl 3-CH(CH<sub>3</sub>)<sub>2</sub>); δ<sub>c</sub> (75 MHz, CDCl<sub>3</sub>); 157.6, 153.5, 149.9, 149.3, 147.4, 146.7, 140.2, 138.9, 138.5, 125.3, 124.8, 123.0, 106.2, 57.2, 49.7, 45.8 (2 × C), 38.2, 37.5, 36.0, 32.2, 28.3, 25.2, 24.2, 20.2, 11.4; ν<sub>max</sub>/cm<sup>-1</sup> (film); 3384, 2935, 1704, 1661, 1603, 1549, 1513, 1455, 1415, 1357, 1314, 1286, 1234; *m/z* (ESI<sup>+</sup>) 2321.3 (30%, [M+Na]<sup>+</sup>); (Found [M+Na]<sup>+</sup>, 2321.2911. C<sub>130</sub>H<sub>161</sub>NaN<sub>32</sub>O<sub>8</sub> requires [M+Na]<sup>+</sup>, 2321.3018); 2298.3 (28%, [M+H]<sup>+</sup>); (Found [M+H]<sup>+</sup>, 2298.3056. C<sub>130</sub>H<sub>161</sub>N<sub>32</sub>O<sub>8</sub> requires [M+H]<sup>+</sup>, 2298.3170); 1171.6 (34%, [M+2Na]<sup>2+</sup>); (Found [M+2Na]<sup>2+</sup>, 1171.6477. C<sub>130</sub>H<sub>160</sub>Na<sub>2</sub>N<sub>32</sub>O<sub>8</sub> requires [M+2Na]<sup>2+</sup>, 1171.6441); 1160.7 (80%, [M+H+Na]<sup>2+</sup>); (Found [M+H+Na]<sup>2+</sup>, 1160.6560. C<sub>130</sub>H<sub>161</sub>NaN<sub>32</sub>O<sub>8</sub> requires [M+H+Na]<sup>2+</sup>, 1160.6531); 1150.2 (100%, [M+2H]<sup>2+</sup>); (Found [M+2H]<sup>2+</sup>, 1149.6660. C<sub>130</sub>H<sub>162</sub>N<sub>32</sub>O<sub>8</sub> requires [M+2H]<sup>2+</sup>, 1149.6621).

NOE data (CDCl<sub>3</sub>) for **8a**.

| Irradiated proton | % Enhancement |      |     |               |                   |
|-------------------|---------------|------|-----|---------------|-------------------|
|                   | 1-H           | 2-H  | 4-H | Ph-H          | Azabicyclooctyl-H |
| 1-H               |               | -8.7 | -   | -             | -                 |
| 2-H               | -6.3          |      | -   | -             | -                 |
| 4-H               | -1.0          | -    |     | -2.2 (δ 7.46) | -2.7 (δ 3.46)     |

**1,1',1'',1'''-(Tricyclo[3.3.1.1<sup>3,7</sup>]<sup>3,7</sup>decane-1,3,5,7-tetrayltetrakis{4,1-phenylene[(2*Z*)-4-(adamantan-1-ylamino)but-2-ene-3,1-diyl]})tetrakis(3,7-dimethyl-3,7-dihydro-1*H*-purine-2,6-dione) (8b).**

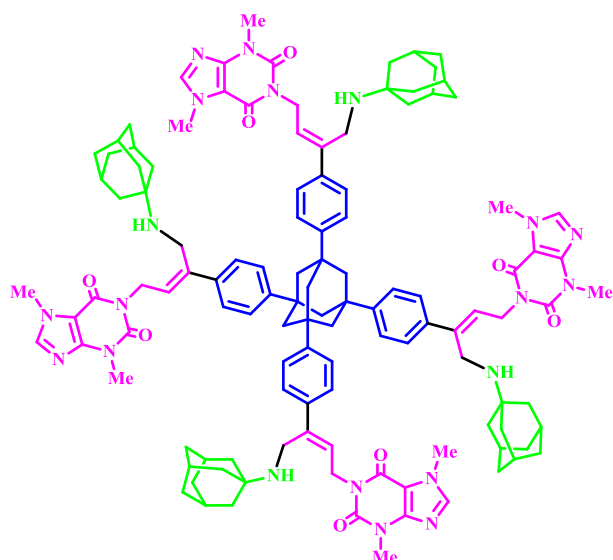

Prepared by general procedure D from **4a** in DMF and heating for 24h. Flash chromatography eluting with 10:1 v/v CHCl<sub>3</sub>/MeOH gave the product **8b** (87%) as a colourless froth, mp 217-219°C;  $\delta_{\text{H}}$  (300 MHz, CDCl<sub>3</sub>); 7.50 (4H, s, 4 × purine-H), 7.49 (8 H, d, *J* 7.6, 8 × phenyl-H), 7.36 (8 H, d, *J* 7.6, 8 × phenyl-H), 5.85 (4H, t, *J* 7.2, 4 × NCH<sub>2</sub>CH=), 4.87 (8H, d, *J* 7.2, 4 × NCH<sub>2</sub>CH=), 3.98 (12H, s, 4 × NMe), 3.85 (8H, s, 4 × =CCH<sub>2</sub>N), 3.57 (12H, s, 4 × NMe), 2.65 (4H, br s, 4 × NH), 2.08 (28H, br s, 12 × adamantyl-CH + 6 × adamantyl-CH<sub>2</sub> + 4 × NH), 1.77 (24H, br s, 12 × adamantyl-CH<sub>2</sub>), 1.66 (24H, br s, 12 × adamantyl-CH<sub>2</sub>);  $\delta_{\text{C}}$  (75 MHz, CDCl<sub>3</sub>); 155.1, 151.4, 148.8, 148.6, 141.5, 141.2, 138.8, 126.3, 125.0, 124.1, 107.7, 51.3, 47.1, 42.2, 39.8, 39.0, 38.9, 36.8, 33.6, 29.8, 29.6;  $\nu_{\text{max}}$ /cm<sup>-1</sup> (film); 2903, 2847, 2366, 1704, 1660, 1604, 1549, 1486, 1454, 1413, 1357, 13101286, 1233; *m/z* (ESI<sup>+</sup>) 1966.1097 (3%, [M+H]<sup>+</sup>); (Found [M+H]<sup>+</sup>, 1966.1097. C<sub>118</sub>H<sub>141</sub>N<sub>20</sub>O<sub>8</sub> requires [M+H]<sup>+</sup>, 1966.1236); 983.6 (93%, [M+2H]<sup>2+</sup>); (Found [M+2H]<sup>2+</sup>, 983.5666. C<sub>118</sub>H<sub>142</sub>N<sub>20</sub>O<sub>8</sub> requires [M+2H]<sup>2+</sup>, 983.5654); 656.0 (100%, [M+3H]<sup>3+</sup>); (Found [M+3H]<sup>3+</sup>, 656.0474. C<sub>118</sub>H<sub>143</sub>N<sub>20</sub>O<sub>8</sub> requires [M+3H]<sup>3+</sup>, 656.0460).

**Tetramethyl** (2*S*,2'*S*,2''*S*,2'''*S*)-2,2',2'',2'''-(tricyclo[3.3.1.1<sup>3,7</sup>]decane-1,3,5,7-tetrayltetrakis{4,1-phenylene[(*ZZ*)-4-(3,7-dimethyl-2,6-dioxo-2,3,6,7-tetrahydro-1*H*-purin-1-yl)but-2-ene-2,1-diyl]imino})tetrakis[3-(1*H*-indol-3-yl)propanoate] (**8c**).

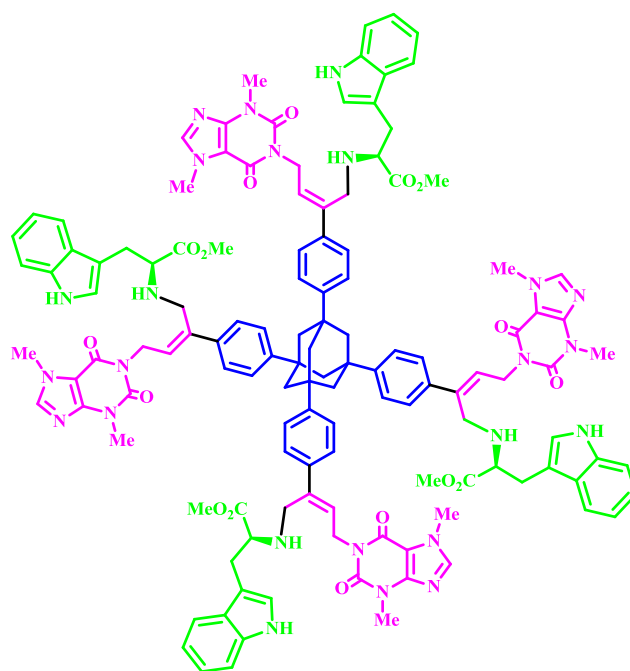

Prepared by general procedure D from **4a** in MeCN and heating for 24h. Flash chromatography eluting with 9:1 v/v CHCl<sub>3</sub>/MeOH gave the product **8c** (45%) as a colourless froth, mp 129-131°C; [ $\alpha$ ]<sub>D</sub> + 9.1;  $\delta$ <sub>H</sub> (300 MHz, CDCl<sub>3</sub>); 7.54 (4H, d, *J* 7.6, 4 × indolyl-H), 7.44 (4H, s, 4 × purine-H), 7.31 (8 H, d, *J* 8.6, 8 × phenyl-H), 7.24 (8 H, d, *J* 8.6, 8 × phenyl-H), 7.17 (4H, dd, *J* 8.6 and 1.0, 4 × indolyl-H), 7.05 (8H, m, 8 × indolyl-H), 6.89 (4H, d, *J* 1.9, 4 × indolyl-H), 5.82 (4H, t, *J* 6.8, 4 × NCH<sub>2</sub>CH=), 4.79 (8H, d, *J* 6.8, 4 × NCH<sub>2</sub>CH=), 9.95-3.90 (4H, m, CHCO<sub>2</sub>Me), 3.90 (12H, s, 4 × NMe), 3.75 (4H, d, *J* 6.7, 4 × =CCH<sub>A</sub>N), 3.72 (4H, d, *J* 6.7, 4 × =CCH<sub>B</sub>N), 3.65 (12H, s, CO<sub>2</sub>Me), 3.52 (12H, s, 4 × NMe), 3.16 (4H, dd, *J* 14.3 and 6.6, 4 × CH<sub>A</sub>CHCO<sub>2</sub>Me), 3.05 (4H, dd, *J* 14.3 and 6.6, 4 × CH<sub>B</sub>CHCO<sub>2</sub>Me), 2.00 (16H, br s, 6 × adamantyl-CH<sub>2</sub> + 4 × NH);  $\delta$ <sub>c</sub> (75 MHz, CDCl<sub>3</sub>); 175.4, 155.0, 151.4, 148.8, 148.4, 141.5, 140.5, 138.6, 136.1, 127.4, 126.3, 124.8 (2 x C), 123.0, 121.8, 119.3, 118.8, 111.3, 111.1, 107.6, 61.7, 51.8, 47.1, 46.6, 39.6, 38.9, 33.6, 32.0, 29.7;  $\nu$ <sub>max</sub>/cm<sup>-1</sup> (film); 3330, 2926, 2853, 1701, 1659, 1549, 1456, 1355, 1233; *m/z* (ESI<sup>+</sup>) 2234.0 (10%, [M+H]<sup>+</sup>); (Found [M+H]<sup>+</sup>, 2234.0270. C<sub>126</sub>H<sub>129</sub>N<sub>24</sub>O<sub>16</sub> requires [M+H]<sup>+</sup>, 2234.0013); 1117.5 (100%, [M+2H]<sup>2+</sup>); (Found [M+2H]<sup>2+</sup>, 1117.5083. C<sub>126</sub>H<sub>130</sub>N<sub>24</sub>O<sub>16</sub> requires [M+2H]<sup>2+</sup>, 1117.5043); 745.3 (40%, [M+3H]<sup>3+</sup>); (Found [M+3H]<sup>3+</sup>, 745.3410. C<sub>126</sub>H<sub>131</sub>N<sub>24</sub>O<sub>16</sub> requires [M+3H]<sup>3+</sup>, 745.3386).



**Tetramethyl (2*S*,2'*S*,2''*S*,2'''*S*)-2,2',2'',2'''-(tricyclo[3.3.1.1<sup>3,7</sup>]decane-1,3,5,7-tetrayltetrakis{4,1-phenylene[(*ZZ*)-4-(3,7-dimethyl-2,6-dioxo-2,3,6,7-tetrahydro-1*H*-purin-1-yl)but-2-ene-2,1-diyl]imino)tetrakis(3-hydroxypropanoate) (8d).**

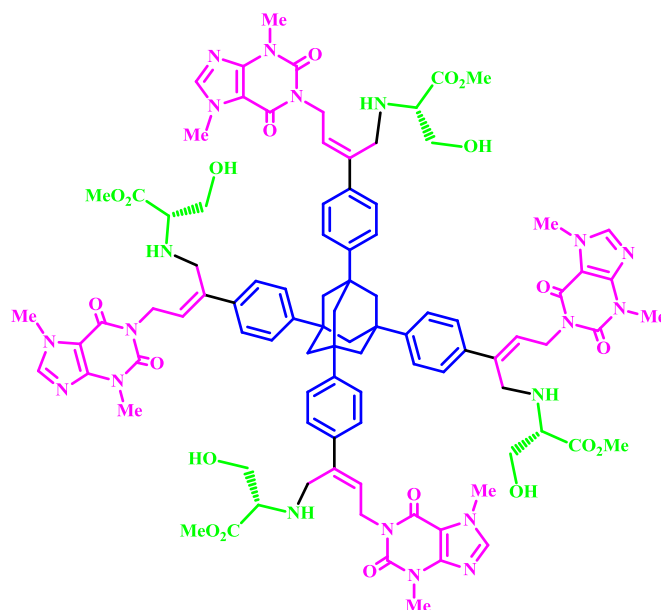

Prepared by general procedure D from **4a** in MeCN and heating for 32h. Flash chromatography eluting with 10:1 v/v CHCl<sub>3</sub>/MeOH gave the product **8d** (49%) as a colourless froth, mp 136-138°C; [α]<sub>D</sub> + 1.3; δ<sub>H</sub> (300 MHz, CDCl<sub>3</sub>); 7.50 (4H, s, 4 × purine-H), 7.44 (8H, d, *J* 8.5, 8 × phenyl-H), 7.38 (8H, d, *J* 8.5, 8 × phenyl-H), 5.91 (4H, t, *J* 7.1, 4 × NCH<sub>2</sub>CH=), 4.95 (4H, dd, *J* 14.3 and 7.1, 4 × NCH<sub>A</sub>CH=), 4.87 (4H, dd, *J* 14.3 and 7.1, 4 × NCH<sub>B</sub>CH=), 3.98 (12H, s, 4 × NMe), 3.97 (4H, d, *J* 12.1, 4 × =CCH<sub>A</sub>N), 3.87 (4H, dd, *J* 10.4 and 3.8, 4 × CHCH<sub>A</sub>OH), 3.80 (4H, d, *J* 12.1, 4 × =CCH<sub>B</sub>N), 3.75 (12H, s, 3 × CO<sub>2</sub>Me), 3.63 (4H, dd, *J* 10.4 and 3.8, 4 × CHCH<sub>B</sub>OH), 3.57 (12H, s, 4 × NMe), 3.58-3.51 (4H, m, 4 × NHCHCH<sub>2</sub>), 2.07 (12H, br s, 6 × adamantyl-CH<sub>2</sub>); δ<sub>c</sub> (75 MHz, CDCl<sub>3</sub>); 173.2, 155.1, 151.4, 148.9, 148.7, 141.6, 140.4, 138.4, 126.2, 125.1, 124.8, 107.7, 62.7, 62.5, 52.1, 47.1, 46.3, 39.6, 39.0, 33.7, 29.8; ν<sub>max</sub>/cm<sup>-1</sup> (film); 3457, 2949, 1733, 1704, 1660, 1604, 1550, 1455, 1355, 1315, 1233; *m/z* (ESI<sup>+</sup>) 1837.8 (14%, [M+H]<sup>+</sup>); (Found [M+H]<sup>+</sup>, 1837.8143. C<sub>94</sub>H<sub>109</sub>N<sub>20</sub>O<sub>20</sub> requires *MH*, 1837.8122); 919.4 (100%, [M+2H]<sup>2+</sup>); (Found [M+2H]<sup>2+</sup>, 919.4139. C<sub>94</sub>H<sub>110</sub>N<sub>20</sub>O<sub>20</sub> requires [M+2H]<sup>2+</sup>, 919.4097); 613 (23%, [M+3H]<sup>3+</sup>); (Found [M+3H]<sup>3+</sup>, 613.2781. C<sub>94</sub>H<sub>111</sub>N<sub>20</sub>O<sub>20</sub> requires [M+3H]<sup>3+</sup>, 613.2756).

**Tetramethyl (2*S*,2'*S*,2''*S*,2'''*S*)-2,2',2'',2'''-(tricyclo[3.3.1.1<sup>3,7</sup>]decane-1,3,5,7-tetrayltetrakis{4,1-phenylene[(*ZZ*)-4-(3,7-dimethyl-2,6-dioxo-2,3,6,7-tetrahydro-1*H*-**

**purin-1-yl)but-2-ene-2,1-diyl]imino(1-oxoethane-2,1-diyl)imino})tetrakis(4-methylpentanoate) (8e).**

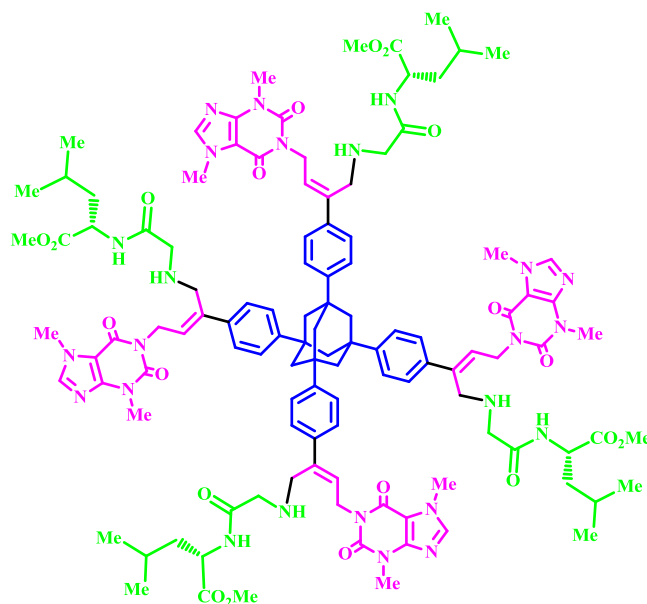

Prepared by general procedure D from **4a** in MeCN and heating for 26h. Flash chromatography eluting with 20:1 v/v CHCl<sub>3</sub>/MeOH gave the product **8e** (55%) as a colourless froth, mp 106-108°C; [ $\alpha$ ]<sub>D</sub> + 0.7;  $\delta_{\text{H}}$  (300 MHz, CDCl<sub>3</sub>); 7.66 (4H, d, *J* 8.2, 4 × CONH), 7.53 (4H, s, 4 × purine-H), 7.41 (8H, d, *J* 8.5, 8 × phenyl-H), 7.37 (8H, d, *J* 8.5, 8 × phenyl-H), 5.85 (4H, t, *J* 7.1, 4 × NCH<sub>2</sub>CH=), 4.91 (4H, dd, *J* 14.3 and 7.1, 4 × NCH<sub>A</sub>CH=), 4.83 (4H, dd, *J* 14.3 and 7.1, 4 × NCH<sub>B</sub>CH=), 4.64 (4H, td, *J* 8.2 and 4.4, 4 × CONHCH), 3.99 (12H, s, 4 × purine 7-NMe), 3.93 (4H, d, *J* 12.9, 4 × =CCH<sub>A</sub>N), 3.82 (4H, d, *J* 12.9, 4 × =CCH<sub>B</sub>N), 3.68 (12H, s, 3 × CO<sub>2</sub>Me), 3.58 (12H, s, 4 × purine 3-NMe), 3.35 (8H, br s, 4 × NHCH<sub>2</sub>CO), 2.08 (12H, br s, 6 × adamantyl-CH<sub>2</sub>), 2.04 (4H, br s, 4 × NH), 1.67-1.44 (12H, m, CH<sub>2</sub>CHMe<sub>2</sub>), 0.90 (12H, d, *J* 4.4, 4 × CHMe<sub>A</sub>), 0.88 (12H, d, *J* 4.4, 4 × CHMe<sub>B</sub>);  $\delta_{\text{C}}$  (75 MHz, CDCl<sub>3</sub>); 173.4, 171.9, 155.0, 151.4, 148.9, 148.6, 141.6, 140.7, 138.7, 126.5, 125.1, 125.0, 107.7, 52.2 (2C, Me and CH<sub>2</sub>), 50.1, 47.9, 47.2, 41.2, 39.5, 39.0, 33.7, 29.8, 24.9, 23.0, 21.8;  $\nu_{\text{max}}$ /cm<sup>-1</sup> (film); 3334, 3008, 2955, 1742, 1705, 1660, 1604, 1549, 1512, 1452, 1355, 1315, 1234; *m/z* (ESI<sup>+</sup>) 2170.1 (6%, [M+H]<sup>+</sup>); (Found [M+H]<sup>+</sup>, 2170.1061. C<sub>114</sub>H<sub>145</sub>N<sub>24</sub>O<sub>20</sub> requires *MH*, 2170.0946); 1085.6 (100%, [M+2H]<sup>2+</sup>); (Found [M+2H]<sup>2+</sup>, 1085.5578. C<sub>114</sub>H<sub>146</sub>N<sub>24</sub>O<sub>20</sub> requires [M+2H]<sup>2+</sup>, 1085.5567); 724.0 (63%, [M+3H]<sup>3+</sup>); (Found [M+3H]<sup>3+</sup>, 724.0418. C<sub>114</sub>H<sub>147</sub>N<sub>24</sub>O<sub>20</sub> requires [M+3H]<sup>3+</sup>, 724.0402).

**1,1',1'',1'''-[Tricyclo[3.3.1.1<sup>3,7</sup>]decane-1,3,5,7-tetrayltetrakis(4,1-phenylene{  
(2*Z*)-4-[3-(3-isopropyl-5-methyl-4*H*-1,2,4-triazol-4-yl)-8-azabicyclo[3.2.1]oct-8-yl]}but-2-  
ene-3,1-diyl)]tetrakis(2', 3', 5'-tri-*O*-acetyluridine) (8f).**

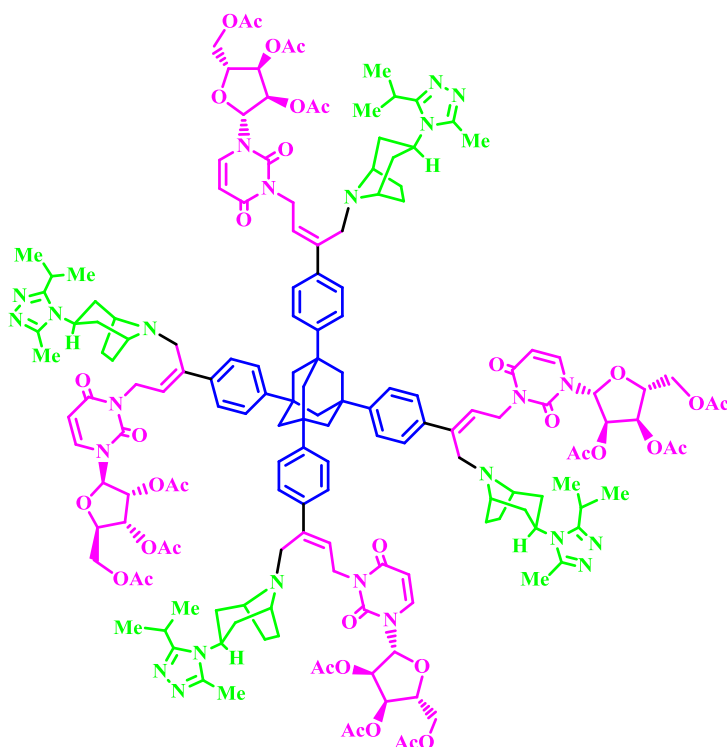

Prepared by general procedure D from **4b** in MeCN and heating for 5h. Flash column chromatography gradient eluting with EtOAc and then 2:1 v/v EtOAc/MeOH gave the product **8f** (56%) as a colourless froth, mp 134-136°C;  $[\alpha]_D + 18.9$  (*c*, 10 mg/1 mL CHCl<sub>3</sub>);  $\delta_H$  (300 MHz, CDCl<sub>3</sub>); 7.45 (8H, d, *J* 8.4, 8 × phenyl-H), 7.40 (8H, d, *J* 8.4, 8 × phenyl-H), 7.38 (4H, s, 4 × pyrimidinyl 6-H), 6.00 (4H, d, *J* 4.6, 4 × ribosyl 1-H), 5.83 (4H, s, 4 × pyrimidinyl 5-H), 5.82 (4H, t, *J* 7.0, 4 × NCH<sub>2</sub>CH=), 5.40-5.32 (8H, m, 4 × ribosyl 2-H + 4 × ribosyl 3-H), 4.86 (4H, dd, *J* 14.8 and 7.0, 4 × NCH<sub>A</sub>CH=), 4.82 (4H, dd, *J* 14.8 and 7.0, 4 × NCH<sub>B</sub>CH=), 4.35 (12H, s, 4 × ribosyl 4-H + 4 × ribosyl 5-CH<sub>2</sub>), 4.26-4.21 (4H, m, 4 × azabicyclooctyl-H), 3.62 (8H, s, 4 × =CCH<sub>2</sub>N), 3.43 (8H, br s, 8 × azabicyclooctyl-H), 2.98-2.90 (4H, m, 4 × triazolyl 3-CH(CH<sub>3</sub>)<sub>2</sub>), 2.37 (12H, s, 4 × triazolyl 5-CH<sub>3</sub>), 2.18-2.02 (28H, m, 16 × azabicyclooctyl-H + 6 × adamantyl-CH<sub>2</sub>), 2.13 (12H, s, 4 × ribosyl OMe), 2.12 (12H, s, 4 × ribosyl OMe), 2.09 (12H, s, 4 × ribosyl OMe), 1.65 (16H, br d, *J* 7.7, 16 × azabicyclooctyl-H), 1.32 (24H, d, *J* 6.7, 4 × triazolyl 3-CH(CH<sub>3</sub>)<sub>2</sub>);  $\delta_C$  (75 MHz, CDCl<sub>3</sub>); 170.1 (CO), 169.6 (2 × CO), 162.0, 159.1, 150.7, 150.67, 148.2, 141.0, 139.9, 137.5, 126.8, 125.2, 124.5, 102.8, 88.8, 79.6, 72.9, 69.9, 62.9, 58.7, 51.2, 47.3 (2 × C), 39.6, 39.0, 37.4, 26.6, 25.7, 21.6, 20.8, 20.5, 12.9 (One aliphatic carbon could not be located due to peak

overlaps);  $\nu_{\max}/\text{cm}^{-1}$  (film); 2934, 1750, 1711, 1669, 1512, 1455, 1386, 1228;  $m/z$  (ESI<sup>+</sup>) 3058.5 (2%, [M+H]<sup>+</sup>); (Found [M+H]<sup>+</sup>, 3058.4522. C<sub>162</sub>H<sub>201</sub>N<sub>24</sub>O<sub>36</sub> requires *MH*, 3058.4630); 1551.7 (100%, [M+2Na]<sup>2+</sup>); (Found [M+2Na]<sup>2+</sup>, 1551.7152. C<sub>162</sub>H<sub>200</sub>Na<sub>2</sub>N<sub>24</sub>O<sub>36</sub> requires [M+2Na]<sup>2+</sup>, 1551.7171); 1529.7 (61%, [M+2H]<sup>2+</sup>); (Found [M+2H]<sup>2+</sup>, 1529.7358. C<sub>162</sub>H<sub>202</sub>N<sub>24</sub>O<sub>36</sub> requires [M+2H]<sup>2+</sup>, 1529.7351).

**1,1',1'',1'''-(Tricyclo[3.3.1.1<sup>3,7</sup>]<sup>1,3,5,7</sup>decane-1,3,5,7-tetrayltetrakis{4,1-phenylene[(2*Z*)-4-(8-fluoro-1,3,4,5-tetrahydro-2*H*-pyrido[4,3-*b*]indol-2-yl)but-2-ene-3,1-diyl])tetrakis(2', 3', 5'-tri-*O*-acetyluridine) (8g).**

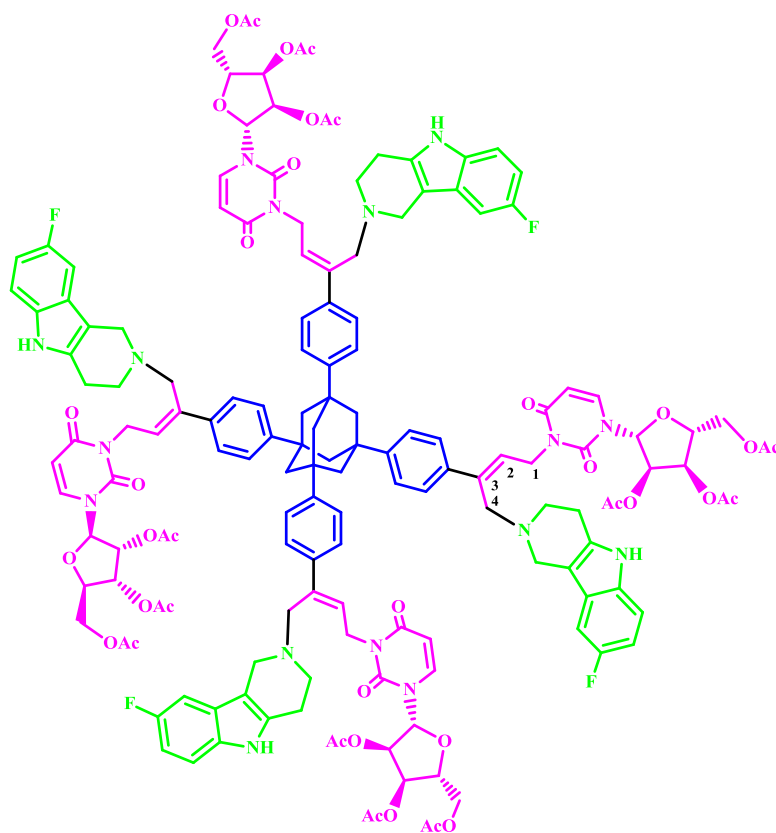

Prepared by general procedure D from **4b** in MeCN and heating for 3h. Flash column chromatography eluting with 30:1 v/v EtOAc/MeOH gave the product **8g** (62 %) as a colourless froth, mp 144-146°C;  $[\alpha]_{\text{D}} + 24.7$  (*c*, 12 mg/1 mL CHCl<sub>3</sub>);  $\delta_{\text{H}}$  (300 MHz, CDCl<sub>3</sub>); 8.02 (4H, br s, 4 × NH), 7.38 (8H, d, *J* 7.9, 8 × phenyl-H), 7.36 (4H, d, *J* 8.2, 4 × pyrimidinyl 6-H), 6.98 (8H, d, *J* 7.9, 8 × phenyl-H), 7.07 (4H, dd, *J* 8.6 and 4.5, 4 × pyridoindolyl-H), 6.98 (4H, dd, *J* 9.5 and 1.8, 4 × pyridoindolyl-H), 6.76 (4H, dt, *J* 9.1 and 2.3, 4 × pyridoindolyl-H), 6.04 (4H, d, *J* 4.4, 4 × ribosyl 1-H), 5.85 (4H, t, *J* 6.4, 4 × NCH<sub>2</sub>CH=), 5.82 (4H, d, *J* 8.2, 4 × pyrimidinyl 5-H), 5.34 (8H, dd, *J* 8.7 and 6.1, 4 × ribosyl 2-H + 4 ×

ribosyl 3-H), 4.81 (8H, d,  $J$  6.4,  $4 \times \text{NCH}_2\text{CH}=\text{}$ ), 4.33 (12H, s,  $4 \times$  ribosyl 4-H +  $4 \times$  ribosyl 5-CH<sub>2</sub>), 3.76 (8H, br s,  $4 \times =\text{CCH}_2\text{N}$ ), 3.64 (8H, br s,  $4 \times$  pyridoindolyl 1-CH<sub>2</sub>), 2.81 (8H, br s,  $4 \times$  pyridoindolyl-CH<sub>2</sub>), 2.60 (8H, br s,  $4 \times$  pyridoindolyl-CH<sub>2</sub>), 2.12 (12H, s,  $4 \times$  ribosyl OMe), 2.11 (12H, s,  $4 \times$  ribosyl OMe), 2.05 (12H, s,  $4 \times$  ribosyl OMe), 1.85 (12H, br s,  $6 \times$  adamantyl-CH<sub>2</sub>);  $\delta_c$  (75 MHz, CDCl<sub>3</sub>); 170.4 (CO), 169.8 (2 x CO), 162.2, 157.7 ( $J$  232.2), 150.9, 148.6, 140.3, 139.6, 137.4, 134.6, 132.5, 126.6 ( $J$  9.2), 126.57, 125.9, 125.0, 111.2 ( $J$  9.2), 109.0 ( $J$  4.5), 108.8 ( $J$  25.3), 103.8, 102.9 ( $J$  25.3), 88.5, 79.9, 73.1, 70.2, 63.2, 49.8, 49.3, 47.1, 40.0, 39.0, 29.9, 23.8, 21.0, 20.7, 20.6;  $\nu_{\text{max}}/\text{cm}^{-1}$  (film); 3373, 3023, 2929, 1748, 1712, 1667, 1483, 1455, 1372, 1325, 1229;  $m/z$  (ESI<sup>+</sup>) 2882.1 (10%, [M+H]<sup>+</sup>); (Found [M+H]<sup>+</sup>, 2882.0786. C<sub>154</sub>H<sub>157</sub>F<sub>4</sub>N<sub>16</sub>O<sub>36</sub> requires  $MH$ , 2882.0877); 1441.5 (100%, [M+2H]<sup>2+</sup>); (Found [M+2H]<sup>2+</sup>, 1441.5480. C<sub>154</sub>H<sub>158</sub>F<sub>4</sub>N<sub>16</sub>O<sub>36</sub> requires [M+2H]<sup>2+</sup>, 1441.5475);  $m/z$  (ESI<sup>+</sup>) 961.4 (100%, [M+3H]<sup>3+</sup>); (Found [M+3H]<sup>3+</sup>, 961.4. C<sub>154</sub>H<sub>159</sub>F<sub>4</sub>N<sub>16</sub>O<sub>36</sub> requires [M+3H]<sup>3+</sup>, 961.3674).

NOE data (CDCl<sub>3</sub>) for **8g**.

| Irradiated proton | % Enhancement |       |      |                       |                                                                         |
|-------------------|---------------|-------|------|-----------------------|-------------------------------------------------------------------------|
|                   | 1-H           | 2-H   | 4-H  | Ph-H                  | pyridoindolyl-H                                                         |
| 1-H               |               | -11.4 | -4.6 | -                     | -1.7 ( $\delta$ 3.64)                                                   |
| 2-H               | -7.3          |       | -    | -6.5 ( $\delta$ 7.38) | -                                                                       |
| 4-H               | -7.0          | -     |      | -7.9 ( $\delta$ 7.38) | -4.9 ( $\delta$ 3.64)<br>-5.8 ( $\delta$ 2.81)<br>-2.1 ( $\delta$ 2.60) |

**1,1',1'',1'''-[Tricyclo[3.3.1.1<sup>3,7</sup>]]decane-1,3,5,7-tetrayltetrakis(4,1-phenylene{(2Z)-4-[3-(3-isopropyl-5-methyl-4H-1,2,4-triazol-4-yl)-8-azabicyclo[3.2.1]oct-8-yl]but-2-ene-3,1-diyl})]tetrakis(3', 5'-di-O-acetylthymidine) (8h).**

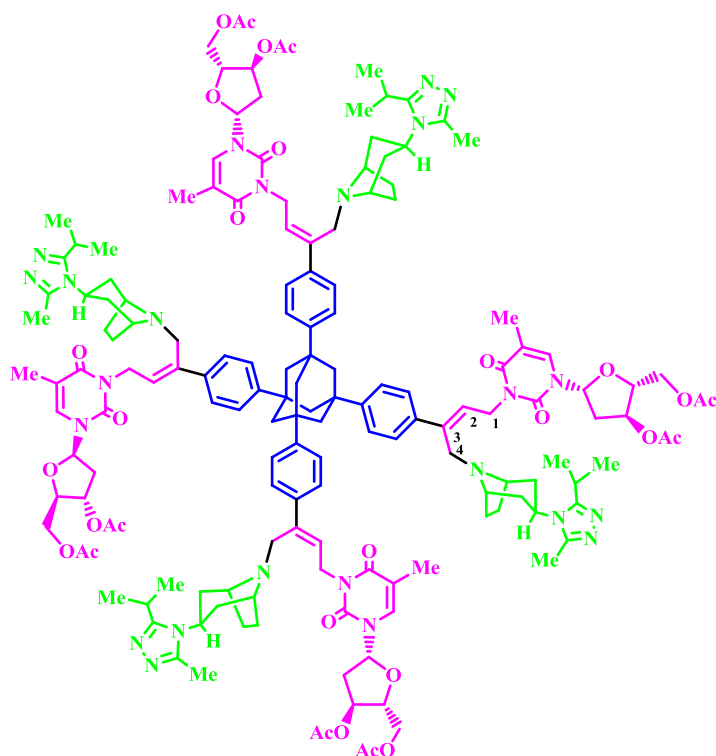

Prepared by general procedure D from **4c** in MeCN and heating for 4h. Flash chromatography gradient eluting with 4:1 v/v EtOAc/MeOH and then 1:1 v/v EtOAc/MeOH gave the product **8h** (69%) as a colourless froth, mp 146-148°C;  $[\alpha]_D + 2.6$  (*c*, 11 mg/1 mL CHCl<sub>3</sub>);  $\delta_H$  (300 MHz, CDCl<sub>3</sub>); 7.46 (8H, d, *J* 8.6, 8 × phenyl-H), 7.37 (8H, d, *J* 8.6, 8 × phenyl-H), 7.29 (4H, s, 4 × pyrimidinyl 6-H), 6.37 (4H, dd, *J* 5.6 and 8.4, 4 × deoxyribosyl 1-H), 5.85 (4H, t, *J* 6.7, 4 × NCH<sub>2</sub>CH=), 5.22 (4H, dd, *J* 4.5 and 2.1, 4 × deoxyribosyl 3-H), 4.87 (8H, d, *J* 6.7, 4 × NCH<sub>2</sub>CH=), 4.37 (4H, dd, *J* 12.2 and 3.6, 4 × deoxyribosyl 5-H<sub>A</sub>), 4.35 (4H, dd, *J* 12.2 and 3.6, 4 × deoxyribosyl 5-H<sub>B</sub>), 4.27-4.24 (8H, m, 4 × azabicyclooctyl-H + 4 × deoxyribosyl 4-H), 3.67 (8H, s, 4 × =CCH<sub>2</sub>N), 3.44 (8H, br s, 8 × azabicyclooctyl-H), 2.98-2.93 (4H, m, 4 × triazolyl 3-CH(CH<sub>3</sub>)<sub>2</sub>), 2.51 (4H, dd, *J* 5.6 and 1.5, 4 × deoxyribosyl 2-H<sub>A</sub>), 2.46 (4H, dd, *J* 5.6 and 1.5, 4 × deoxyribosyl 2-H<sub>B</sub>), 2.37 (12H, s, 4 × triazolyl 5-CH<sub>3</sub>), 2.23-2.05 (28H, m, 16 × azabicyclooctyl-H + 6 × adamantyl-CH<sub>2</sub>), 2.14 (12H, s, 4 × deoxyribosyl OMe), 2.12 (12H, s, 4 × deoxyribosyl OMe), 1.96 (12H, s, 4 × pyrimidinyl 5-Me), 1.66 (16H, br d, *J* 7.9, 16 × azabicyclooctyl-H), 1.32 (24H, d, *J* 6.9, 4 × triazolyl 3-CH(CH<sub>3</sub>)<sub>2</sub>);  $\delta_C$  (75 MHz, CDCl<sub>3</sub>); 170.8, 170.6, 163.4, 159.5, 151.1, 151.0, 148.6, 141.2, 140.3, 133.2, 127.1, 125.9, 124.9, 111.2, 85.9, 82.5, 74.5, 64.3, 59.1, 51.6, 47.7 (2 × C), 40.2, 39.4, 37.9, 37.8, 27.1, 26.1, 22.0, 21.3, 21.2, 13.9, 13.3;  $\nu_{max}/cm^{-1}$  (film); 3333, 2932, 1746, 1703, 1668, 1645, 1513, 1467, 1366, 1235; *m/z* (ESI<sup>+</sup>) 2904.5 (8%, [M+Na]<sup>+</sup>); (Found [M+Na]<sup>+</sup>, 2904.4779. C<sub>158</sub>H<sub>200</sub>NaN<sub>24</sub>O<sub>28</sub> requires *MNa*, 2904.4856); 2882.5 (15%,

[M+H]<sup>+</sup>; (Found [M+H]<sup>+</sup>, 2882.4986. C<sub>158</sub>H<sub>201</sub>N<sub>24</sub>O<sub>28</sub> requires *MH*, 2882.5037); 1493.7 (68%, [M+2Na]<sup>2+</sup>); (Found [M+2Na]<sup>2+</sup>, 1463.7397. C<sub>158</sub>H<sub>200</sub>NaN<sub>24</sub>O<sub>28</sub> requires [M+2Na]<sup>2+</sup>, 1463.7374); 1441.8 (100%, [M+2H]<sup>2+</sup>); (Found [M+2H]<sup>2+</sup>, 1441.7615. C<sub>158</sub>H<sub>202</sub>N<sub>24</sub>O<sub>28</sub> requires [M+2H]<sup>2+</sup>, 1441.7555).

NOE data (CDCl<sub>3</sub>) for **8h**.

| Irradiated proton | % Enhancement |      |      |               |                   |
|-------------------|---------------|------|------|---------------|-------------------|
|                   | 1-H           | 2-H  | 4-H  | Ph-H          | Azabicyclooctyl-H |
| 1-H               |               | -9.5 | -1.1 | -             | -                 |
| 2-H               | -5.1          |      | -    | -             | -                 |
| 4-H               | -2.1          | -    |      | -1.9 (δ 7.46) | -4.3 (δ 3.44)     |

**1,1',1'',1'''-(Tricyclo[3.3.1.1<sup>3,7</sup>]*decane-1,3,5,7-tetra*yltetrakis{4,1-phenylene[(2*Z*)-4-(8-fluoro-1,3,4,5-tetrahydro-2*H*-pyrido[4,3-*b*]indol-2-yl)but-2-ene-3,1-diyl])tetrakis(3', 5'-di-*O*-acetylthymidine) (8i).**

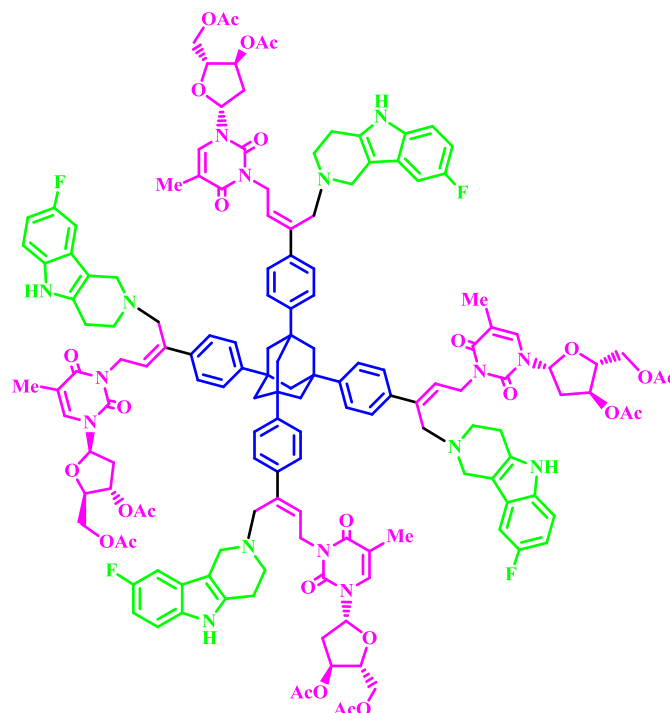

Prepared by general procedure D from **4c** in MeCN and heating for 6h. Flash column chromatography eluting with 20:1 v/v EtOAc/MeOH gave the product **8i** (74%) as a colourless froth, mp 155-157°C; [α]<sub>D</sub> +6.2 (*c*, 11 mg/1 mL CHCl<sub>3</sub>); δ<sub>H</sub> (300 MHz, CDCl<sub>3</sub>); 8.18 (4H, br s, 4 × NH), 7.36 (8H, d, *J* 8.1, 8 × phenyl-H), 7.26 (4H, s, 4 × pyrimidinyl 6-H), 7.13 (8H, d, *J* 8.1, 8 × phenyl-H), 7.02 (4H, dd, *J* 8.5 and 4.4, 4 × pyridindolyl-H), 6.95 (4H,

dd,  $J$  9.6 and 1.9, 4 × pyridoindolyl-H), 6.73 (4H, dt,  $J$  9.2 and 2.4, 4 × pyridoindolyl-H), 6.36 (4H, dd,  $J$  7.9 and 5.9, 4 × deoxyribosyl 1-H), 5.85 (4H, t,  $J$  6.5, 4 × NCH<sub>2</sub>CH=), 5.20 (4H, dd,  $J$  4.4 and 1.8, 4 × deoxyribosyl 3-H), 4.82 (8H, d,  $J$  6.5, 4 × NCH<sub>2</sub>CH=), 4.38 (4H, dd,  $J$  12.2 and 3.7, 4 × deoxyribosyl 5-H<sub>A</sub>), 4.30 (4H, dd,  $J$  12.2 and 3.7, 4 × deoxyribosyl 5-H<sub>B</sub>), 4.23 (4H, dd,  $J$  5.8 and 3.2, 4 × deoxyribosyl 4-H), 3.76 (8H, br s, 4 × =CCH<sub>2</sub>N), 3.61 (8H, br s, 4 × pyridoindolyl 1-CH<sub>2</sub>), 2.77 (8H, br s, 4 × pyridoindolyl-CH<sub>2</sub>), 2.50-2.43 (16H, br m, 4 × pyridoindolyl-CH<sub>2</sub> + 4 × deoxyribosyl 2-CH<sub>2</sub>), 2.12 (12H, s, 4 × deoxyribosyl OMe), 2.10 (12H, s, 4 × deoxyribosyl OMe), 1.95 (12H, s, 4 × pyrimidinyl 5-Me), 1.77 (12H, br s, 6 × adamantyl-CH<sub>2</sub>);  $\delta_c$  (75 MHz, CDCl<sub>3</sub>); 169.3, 169.1, 161.8, 156.3 ( $J$  232.2), 149.5, 147.2, 138.9, 138.3, 133.2, 131.5, 131.2, 125.2 ( $J$  9.2), 125.15, 124.7, 123.6, 109.7 ( $J$  9.2), 109.5, 107.4 ( $J$  4.5), 107.3 ( $J$  25.2), 101.4 ( $J$  23.0), 84.3, 80.9, 73.0, 62.7, 54.5, 48.6, 47.9, 45.7, 38.8, 37.5, 36.4, 22.3, 19.7, 19.66, 12.3;  $\nu_{\max}/\text{cm}^{-1}$  (film); 3346, 2927, 1744, 1702, 1643, 1465, 1366, 1325, 1232;  $m/z$  (ESI<sup>+</sup>) 2706.1 (2%, [M+H]<sup>+</sup>); (Found [M+H]<sup>+</sup>, 2706.1237. C<sub>150</sub>H<sub>157</sub>F<sub>4</sub>N<sub>16</sub>O<sub>28</sub> requires  $MH$ , 2705.1284);  $m/z$  (ESI<sup>+</sup>) 1353.6 (59%, [M+2H]<sup>2+</sup>); (Found [M+2H]<sup>2+</sup>, 1353.5679. C<sub>150</sub>H<sub>158</sub>F<sub>4</sub>N<sub>16</sub>O<sub>28</sub> requires [M+2H]<sup>2+</sup>, 1353.5678); 902.7 (100%, [M+3H]<sup>3+</sup>); (Found [M+3H]<sup>3+</sup>, 902.7141. C<sub>150</sub>H<sub>159</sub>F<sub>4</sub>N<sub>16</sub>O<sub>28</sub> requires [M+3H]<sup>3+</sup>, 902.7143).

## References

1. H. B. Lazrek, J. W. Engels, W. Pfeleiderer, *Nucleosides and Nucleotides*, **1998**, 17, 1851-1856.
2. J. Kuang, S. Ma, *J. Org. Chem.* **2009**, 74, 1763-1765.
3. D. Bruyere, R. Grigg, J. Hinsley, R. K. Hussain, S. Korn, C. Orgaz De La Cierva, V. Sridharana, J. Wanga, *Tetrahedron Lett.* **2003**, 44, 8669-8672.
4. A. Casaschi, R. Grigg, J. M. Sansano, *Tetrahedron* **2000**, 56, 7553-7560.
5. J. W. Daly, W. L. Padgett, M. T. Shamim, *J. Med. Chem.* **1986**, 29, 1305-1308.



## School of Chemistry Mass Spectrometry Service

Comment EE-90  
Sample Name EE-90  
Analysis Name D:\Data\Sept.2011\EE-90\_1-B,6\_01\_14764.d  
Method steve200-2500lc.m  
Instrument micrOTOF

Operator Tanya  
Acquisition Date 27/09/2011 10:04:51

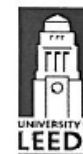

Source Type ESI Ion Polarity Positive Scan Begin 50 m/z Scan End 2500 m/z

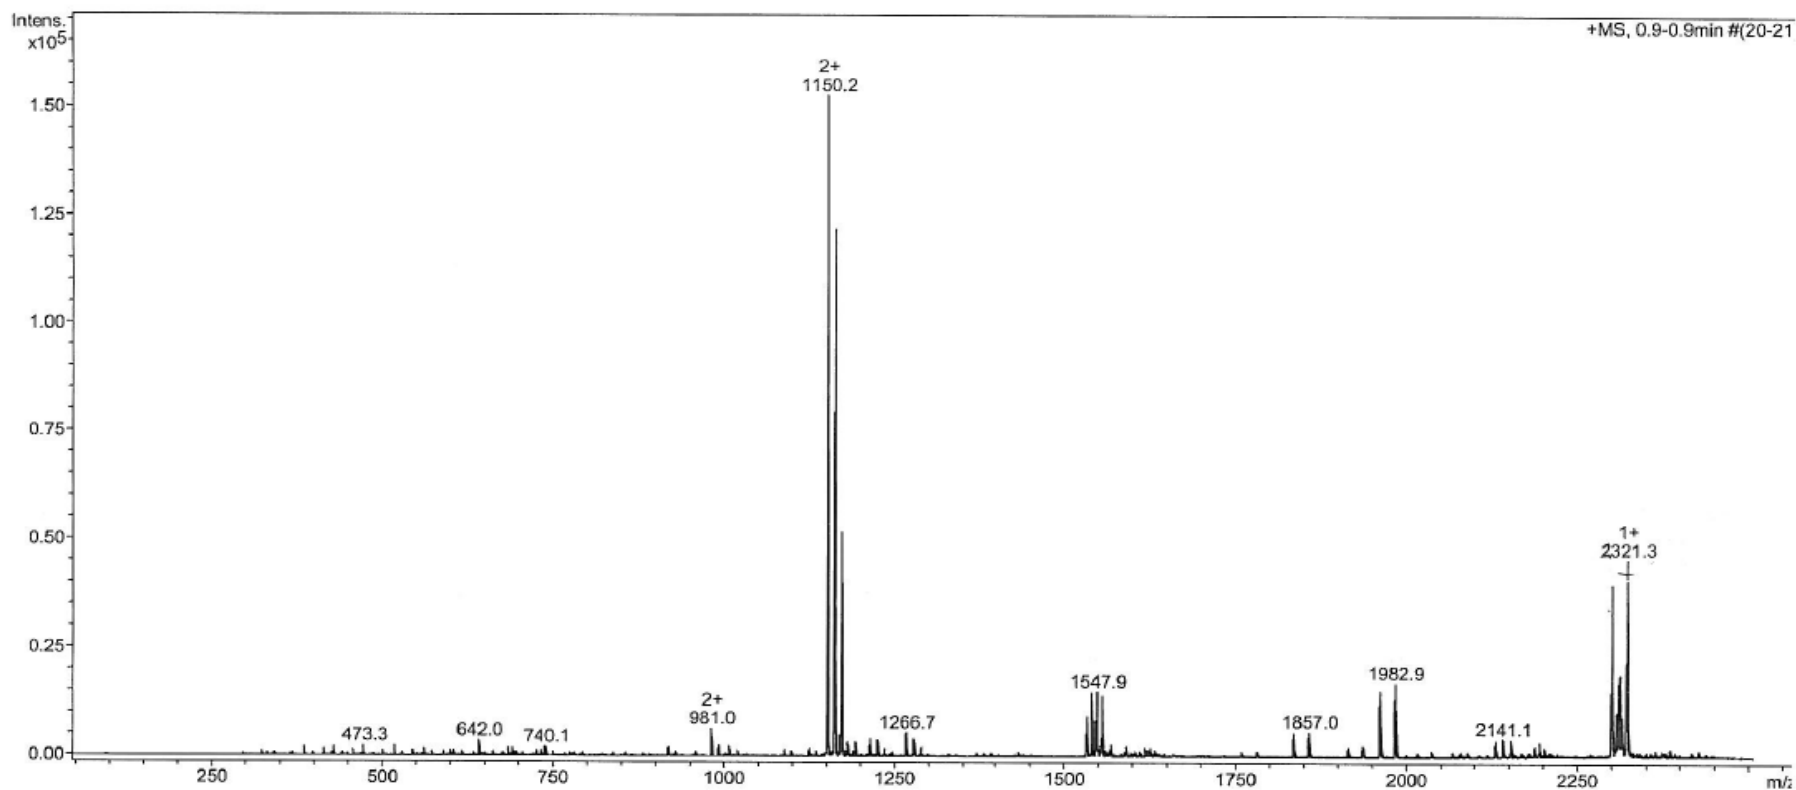

Fig. (1): HRMS of **8a** using autosampler technique.

## School of Chemistry Mass Spectrometry Service

Comment EE-103DMF  
Sample Name 116878  
Analysis Name D:\Data\May 2012\116878\_1-B,2\_01\_17208.d  
Method steve200-2500lc.m  
Instrument micrOTOF

Operator Tanya  
Acquisition Date 23/05/2012 17:13:12

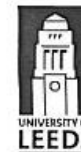

Source Type ESI Ion Polarity Positive Scan Begin 50 m/z Scan End 2500 m/z

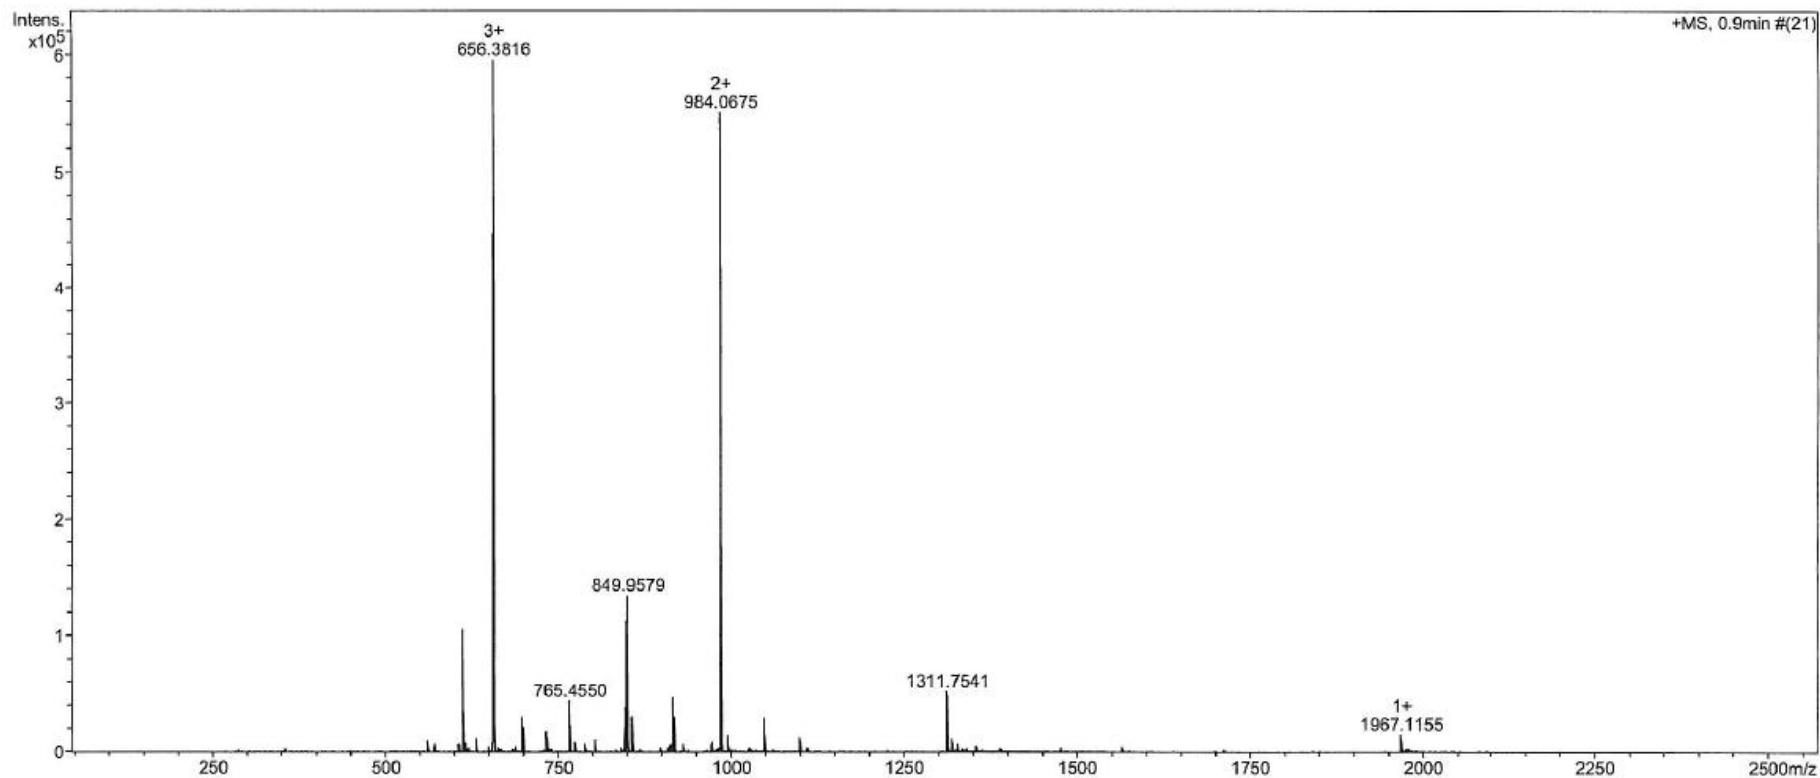

Fig. (2): HRMS of **8b** using autosampler technique.

### School of Chemistry Mass Spectrometry Service

Comment EE-104  
Sample Name 116851  
Analysis Name D:\Data\May 2012\116851\_1-B,1\_01\_17207.d  
Method steve200-2500lc.m  
Instrument micrOTOF

Operator Tanya  
Acquisition Date 23/05/2012 16:43:39

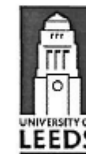

Source Type ESI Ion Polarity Positive Scan Begin 50 m/z Scan End 2500 m/z

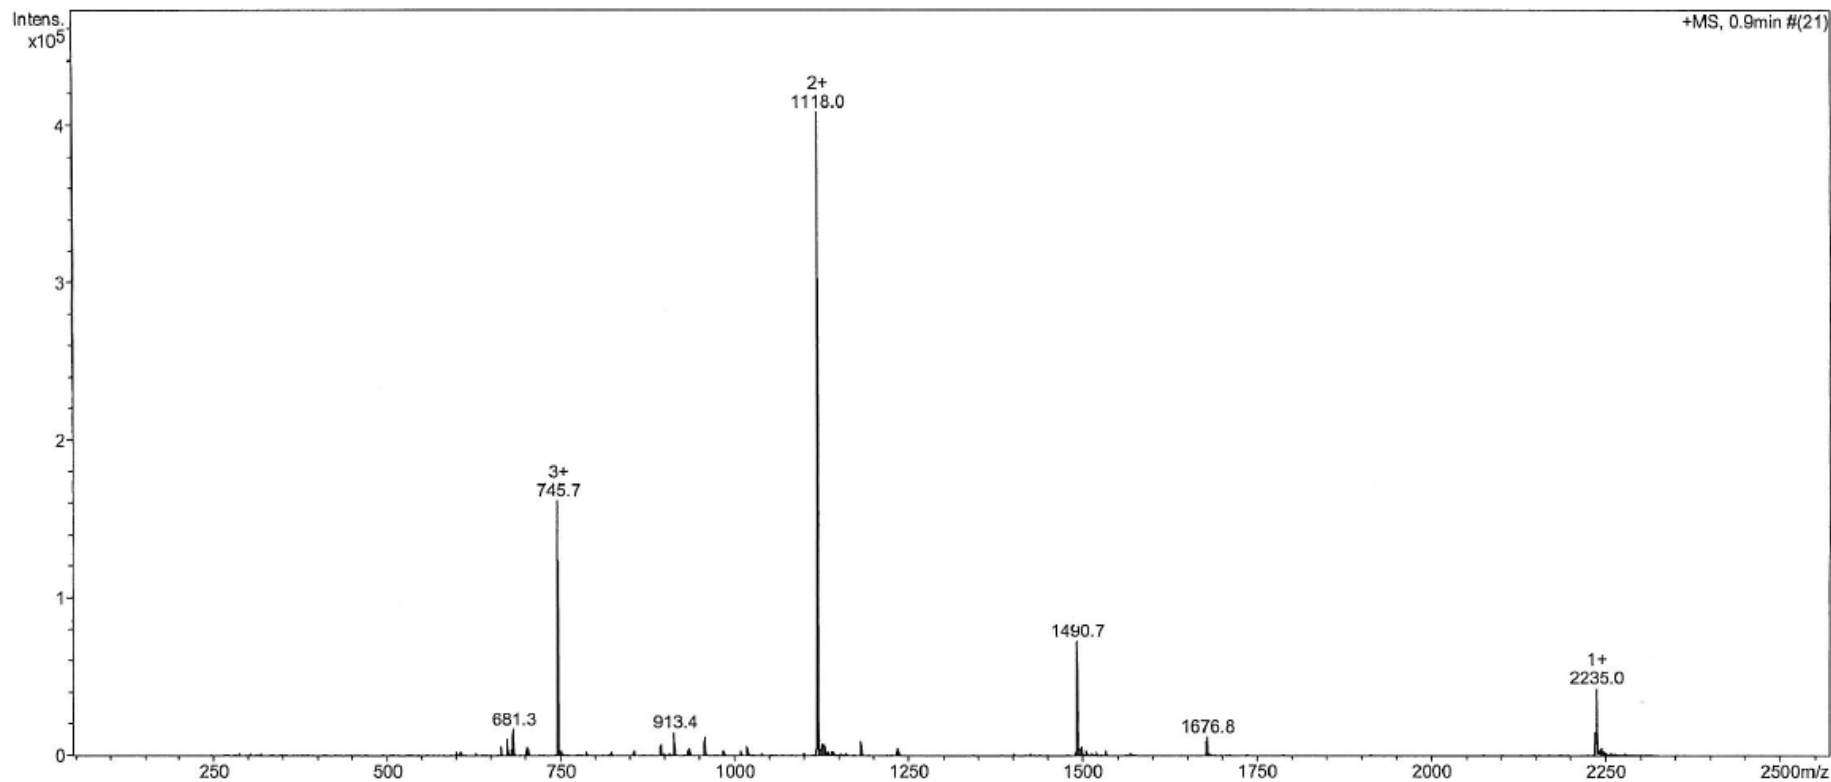

Fig. (3): HRMS of **8c** using autosampler technique.

## School of Chemistry Mass Spectrometry Service

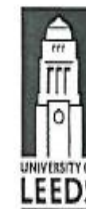

|               |                                            |                  |                     |
|---------------|--------------------------------------------|------------------|---------------------|
| Comment       | EE-176[36-45]                              | Operator         | Tanya               |
| Sample Name   | 116706                                     | Acquisition Date | 30/04/2012 16:38:05 |
| Analysis Name | D:\Data\April 2012\116706_1-B,5_01_16985.d |                  |                     |
| Method        | steve200-2500lc.m                          |                  |                     |
| Instrument    | micrOTOF                                   | Source Type      | ESI                 |
|               |                                            | Ion Polarity     | Positive            |
|               |                                            | Scan Begin       | 50 m/z              |
|               |                                            | Scan End         | 2500 m/z            |

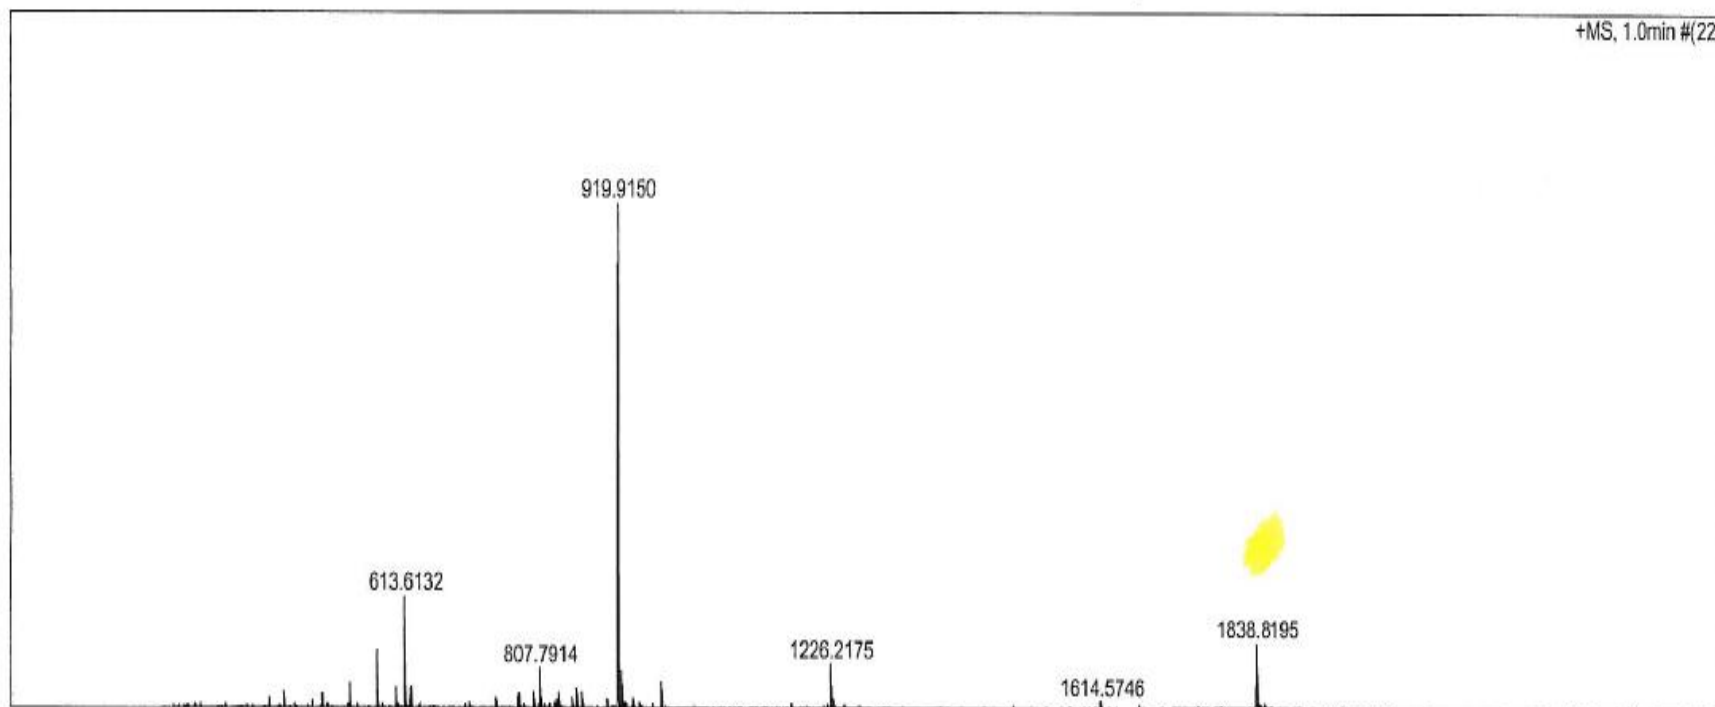

Fig. (4): HRMS of **8d** using autosampler technique.

## School of Chemistry Mass Spectrometry Service

Comment EE-175[32-35]  
Sample Name 116664  
Analysis Name D:\Data\April 2012\116664\_1-C,1\_01\_16940.d  
Method steve200-2500lc.m  
Instrument micrOTOF

Operator Tanya  
Acquisition Date 26/04/2012 11:01:50

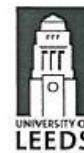

Source Type ESI Ion Polarity Positive Scan Begin 50 m/z Scan End 2500 m/z

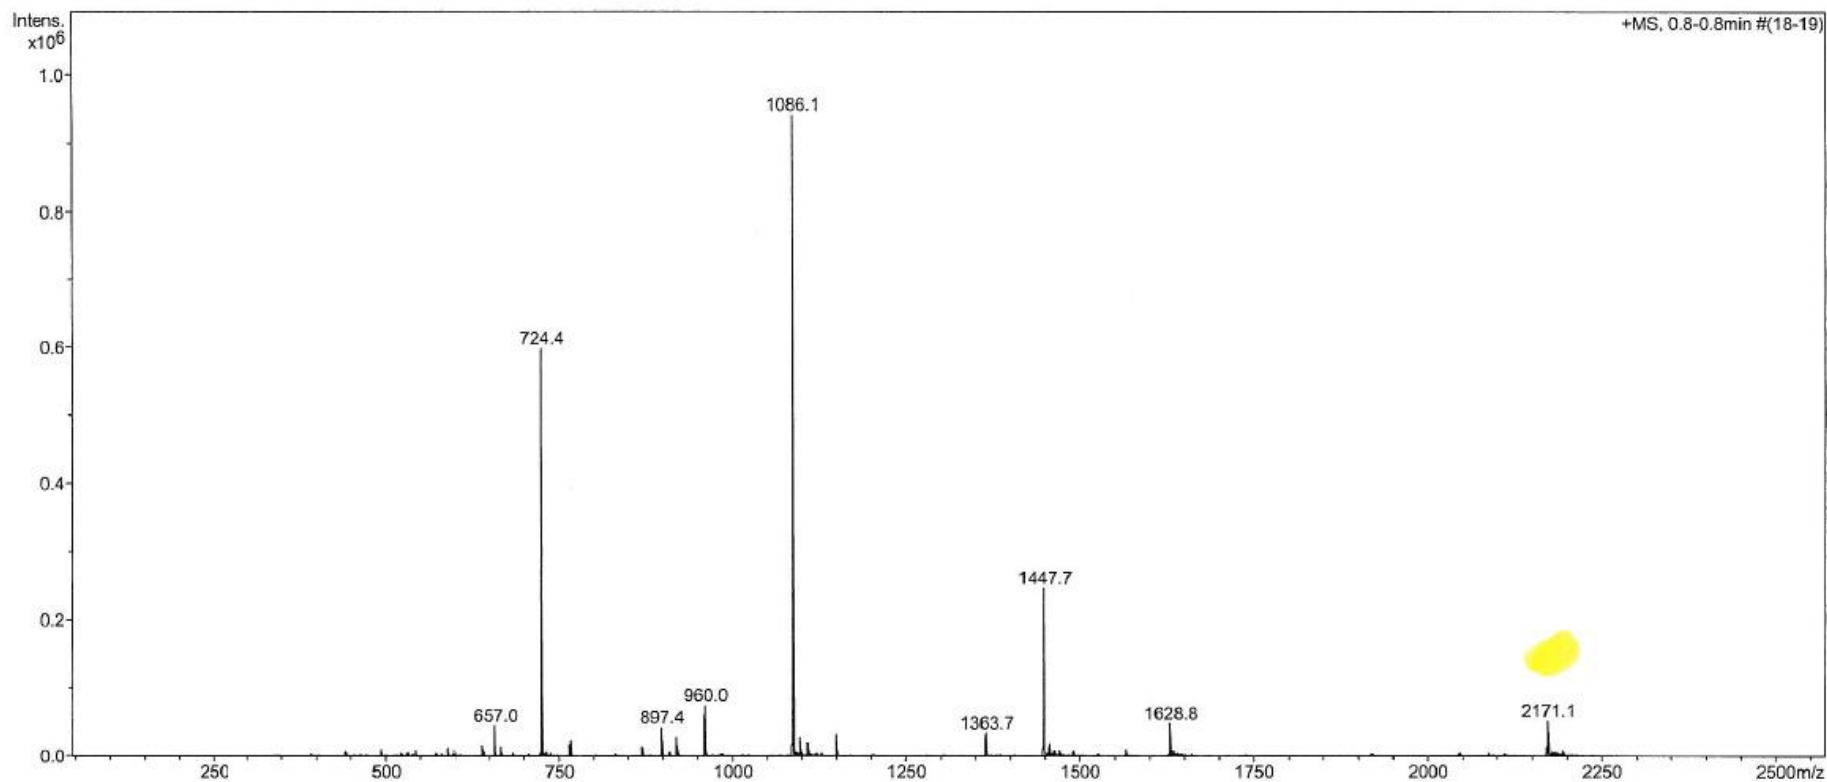

Fig. (5): HRMS of **8e** using autosampler technique.

## School of Chemistry Mass Spectrometry Service

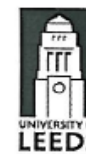

|               |                                   |                  |                     |
|---------------|-----------------------------------|------------------|---------------------|
| Comment       | EE-99                             | Operator         | Tanya               |
| Sample Name   | EE-99                             | Acquisition Date | 28/09/2011 12:01:18 |
| Analysis Name | D:\Data\Sept.2011\EE-99.d         |                  |                     |
| Method        | Anneke200-5000 syringe positive.m |                  |                     |
| Instrument    | micrOTOF                          | Source Type      | ESI                 |
|               |                                   | Ion Polarity     | Positive            |
|               |                                   | Scan Begin       | 200 m/z             |
|               |                                   | Scan End         | 5000 m/z            |

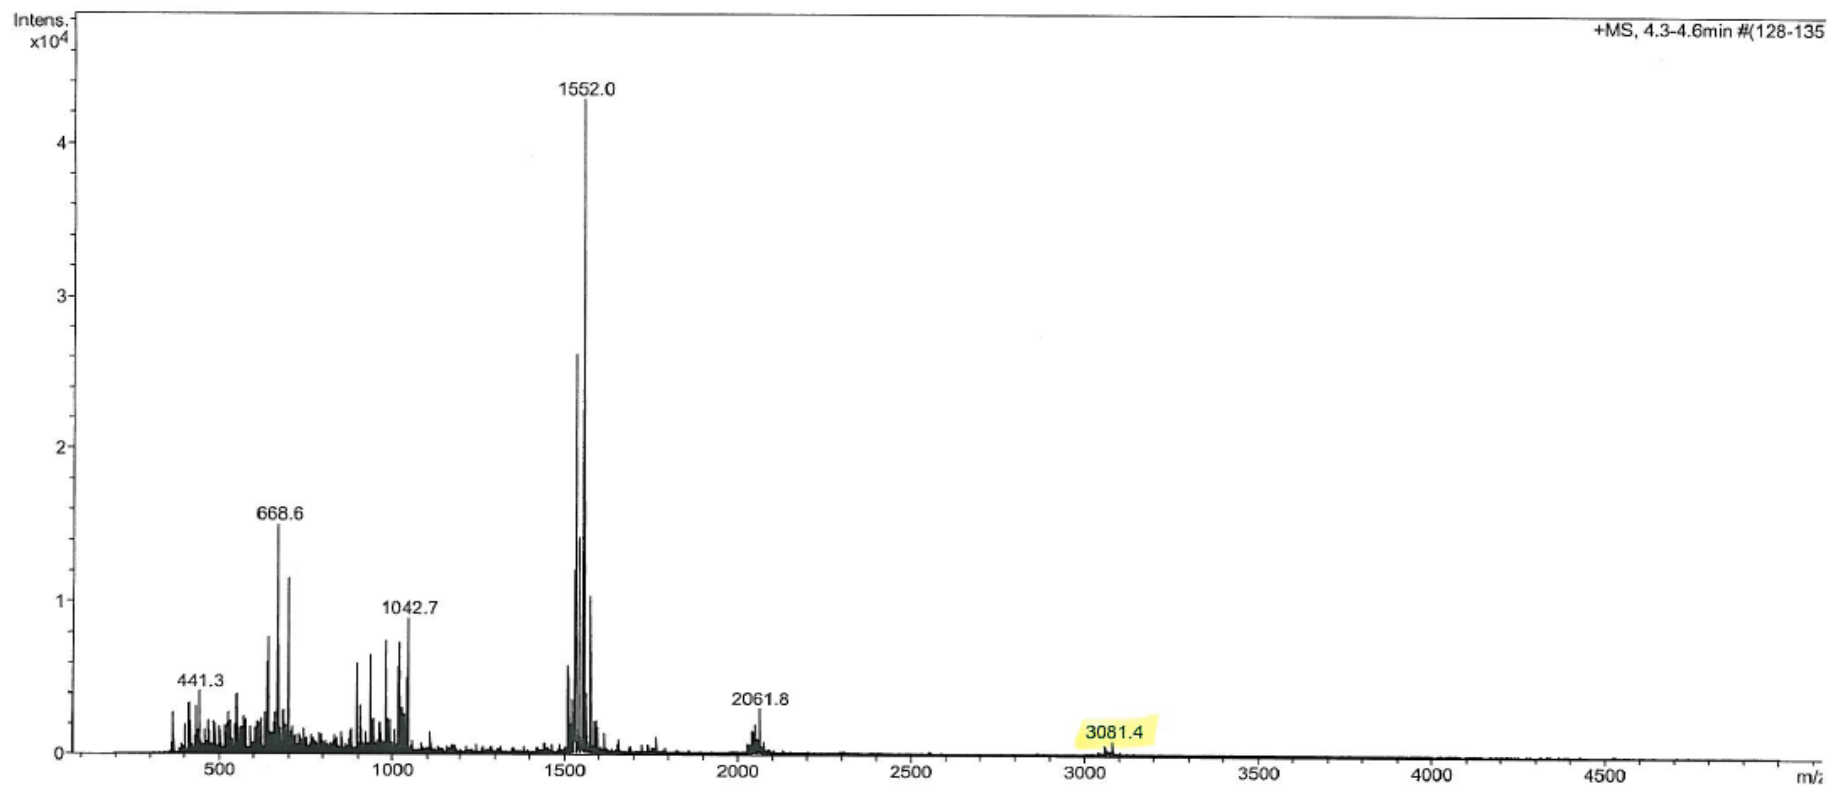

Fig. (6): HRMS of **8f** using syringe pump technique.

## School of Chemistry Mass Spectrometry Service

Comment EE-199[34-41]  
Sample Name 112950  
Analysis Name D:\Data\January2011\112950\_1-C\_5\_01\_12309.d  
Method steve 200-2500 lc.m  
Instrument micrOTOF

Operator Tanya  
Acquisition Date 25/01/2011 15:47:02

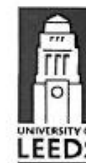

Source Type ESI Ion Polarity Positive Scan Begin 50 m/z Scan End 2500 m/z

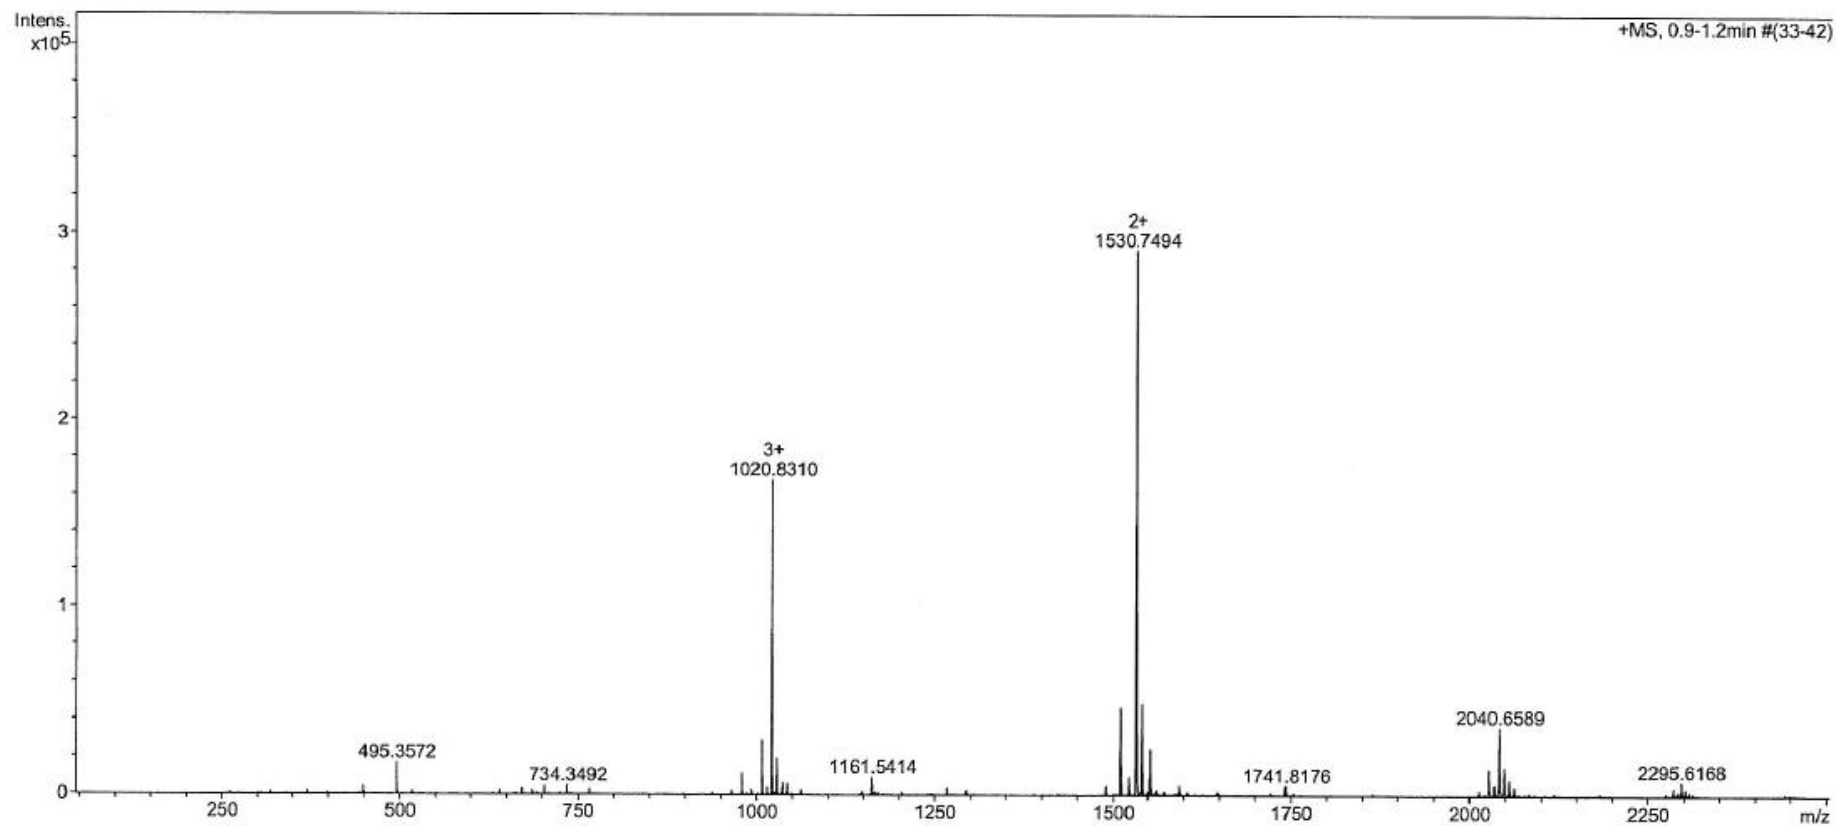

Fig. (7): HRMS of **8f** using autosampler technique.

## School of Chemistry Mass Spectrometry Service

|               |                                   |                  |                     |
|---------------|-----------------------------------|------------------|---------------------|
| Comment       | EE-100                            | Operator         | Tanya               |
| Sample Name   | EE-100                            | Acquisition Date | 28/09/2011 11:18:48 |
| Analysis Name | D:\Data\Sept.2011\EE-100.d        |                  |                     |
| Method        | Anneke200-5000 syringe positive.m |                  |                     |
| Instrument    | micrOTOF                          | Source Type      | ESI                 |
|               |                                   | Ion Polarity     | Positive            |
|               |                                   | Scan Begin       | 200 m/z             |
|               |                                   | Scan End         | 5000 m/z            |

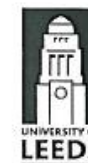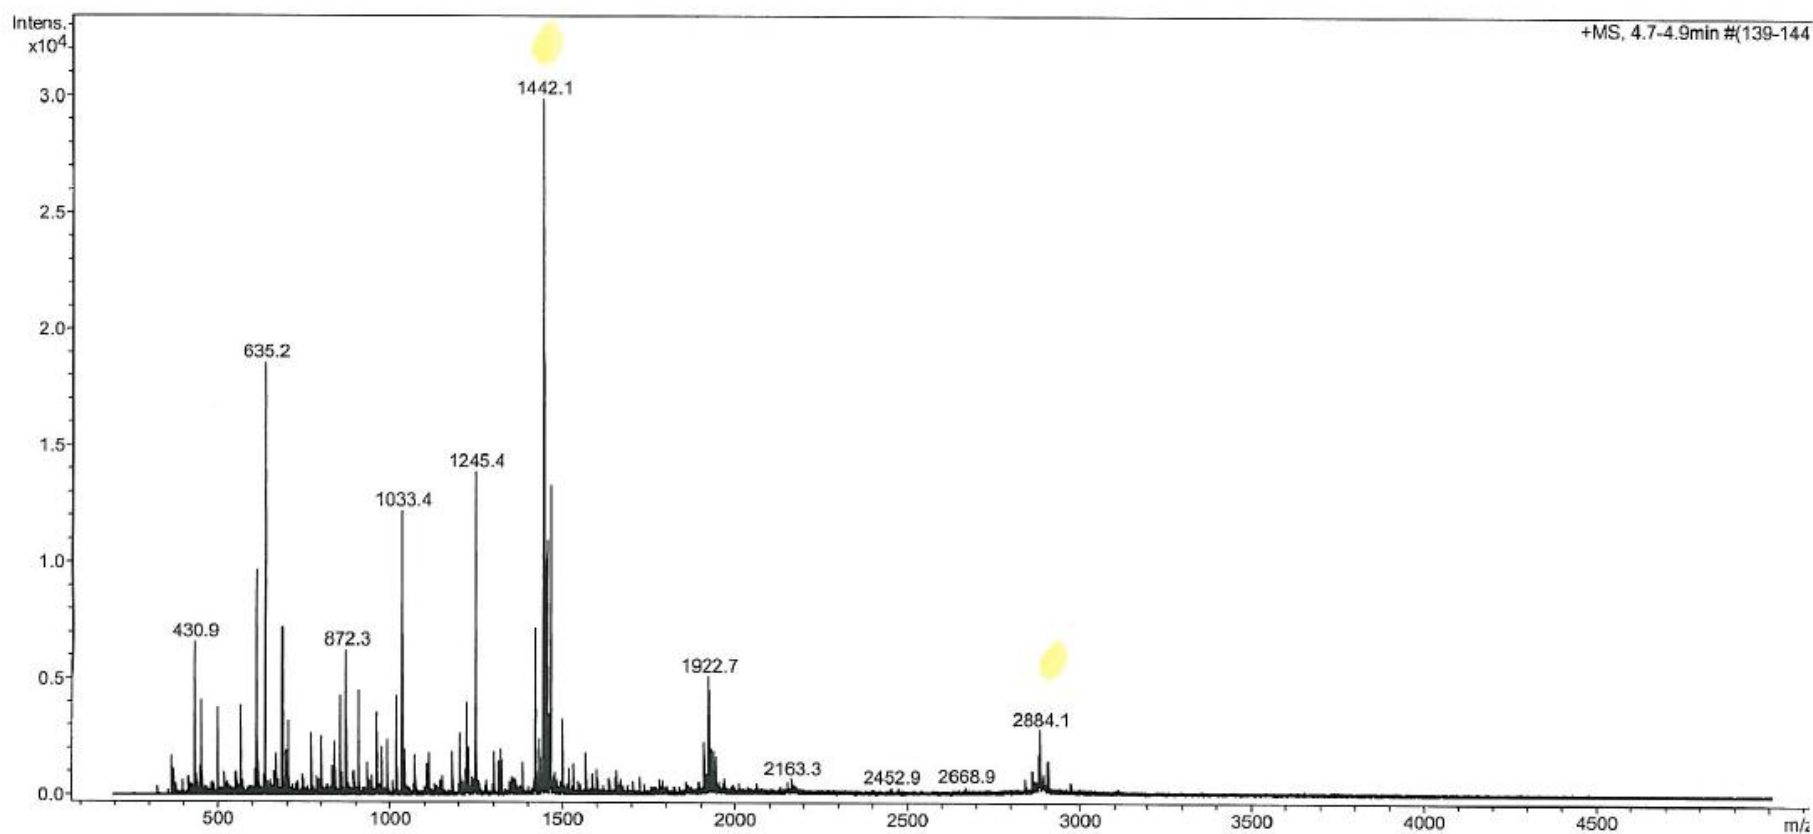

Fig. (8): HRMS of **8g** using syringe pump technique.



## School of Chemistry Mass Spectrometry Service

Comment EE-100[19-22]  
Sample Name 112951  
Analysis Name D:\Data\Sept.2011\112951\_1-C,4\_01\_12308.d  
Method steve 200-2500 lc.m  
Instrument micrOTOF

Operator Tanya  
Acquisition Date 25/01/2011 15:03:24

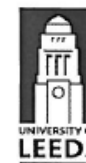

Source Type ESI Ion Polarity Positive Scan Begin 50 m/z Scan End 2500 m/z

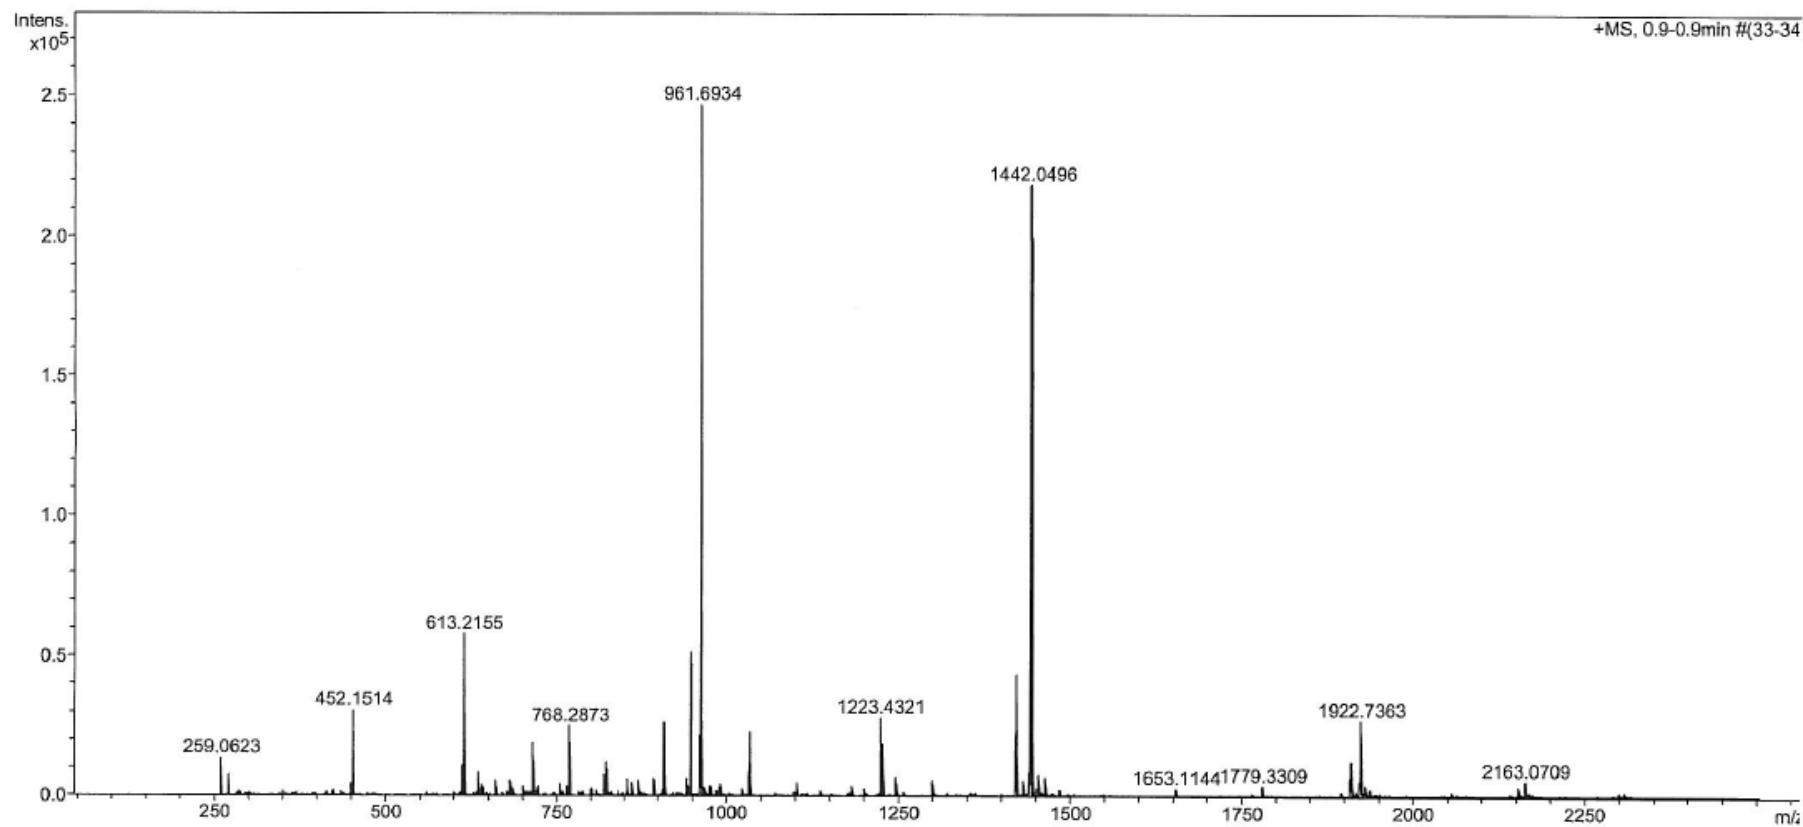

Fig. (9): HRMS of **8g** using autosampler technique.

## School of Chemistry Mass Spectrometry Service

|               |                                   |                  |                     |              |          |            |         |          |          |
|---------------|-----------------------------------|------------------|---------------------|--------------|----------|------------|---------|----------|----------|
| Comment       | EE-93                             | Operator         | Tanya               |              |          |            |         |          |          |
| Sample Name   | EE-93                             | Acquisition Date | 28/09/2011 10:23:27 |              |          |            |         |          |          |
| Analysis Name | D:\Data\Sept.2011\EE-93.d         |                  |                     |              |          |            |         |          |          |
| Method        | Anneke200-5000 syringe positive.m |                  |                     |              |          |            |         |          |          |
| Instrument    | microTOF                          | Source Type      | ESI                 | Ion Polarity | Positive | Scan Begin | 200 m/z | Scan End | 5000 m/z |

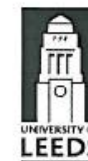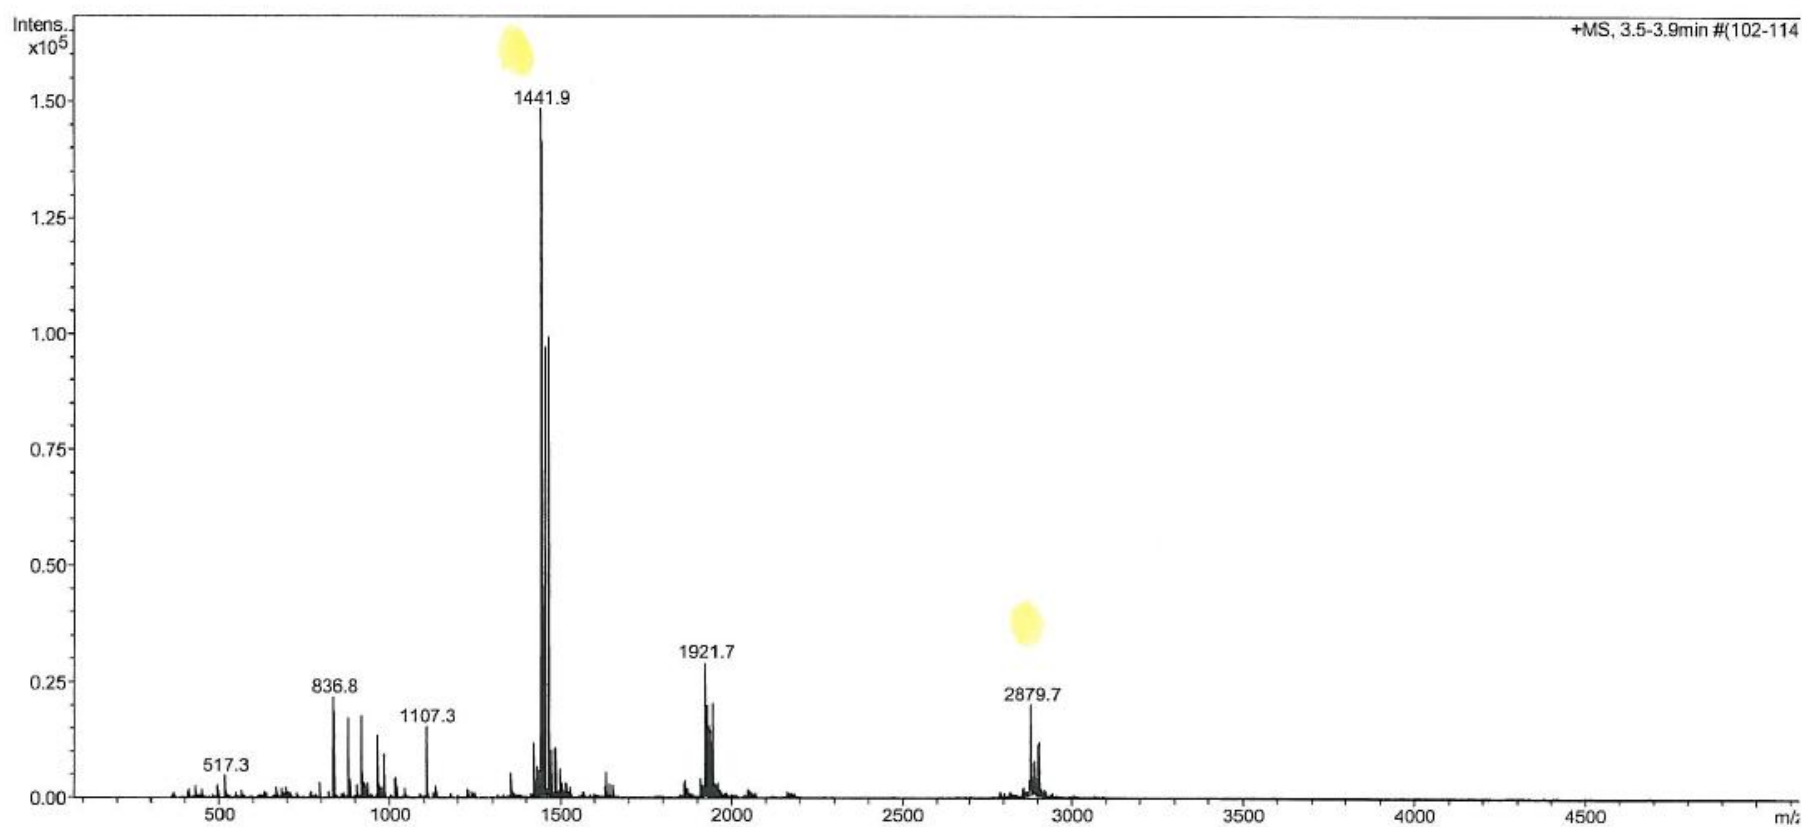

Fig. (10): HRMS of **8h** using syringe pump technique.

## School of Chemistry Mass Spectrometry Service

|               |                                   |                  |                     |
|---------------|-----------------------------------|------------------|---------------------|
| Comment       | EE-95                             | Operator         | Tanya               |
| Sample Name   | EE-95                             | Acquisition Date | 28/09/2011 09:53:11 |
| Analysis Name | D:\Data\Sept.2011\EE-95.d         |                  |                     |
| Method        | Anneke200-5000 syringe positive.m |                  |                     |
| Instrument    | micrOTOF                          | Source Type      | ESI                 |
|               |                                   | Ion Polarity     | Positive            |
|               |                                   | Scan Begin       | 200 m/z             |
|               |                                   | Scan End         | 5000 m/z            |

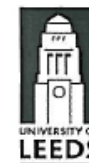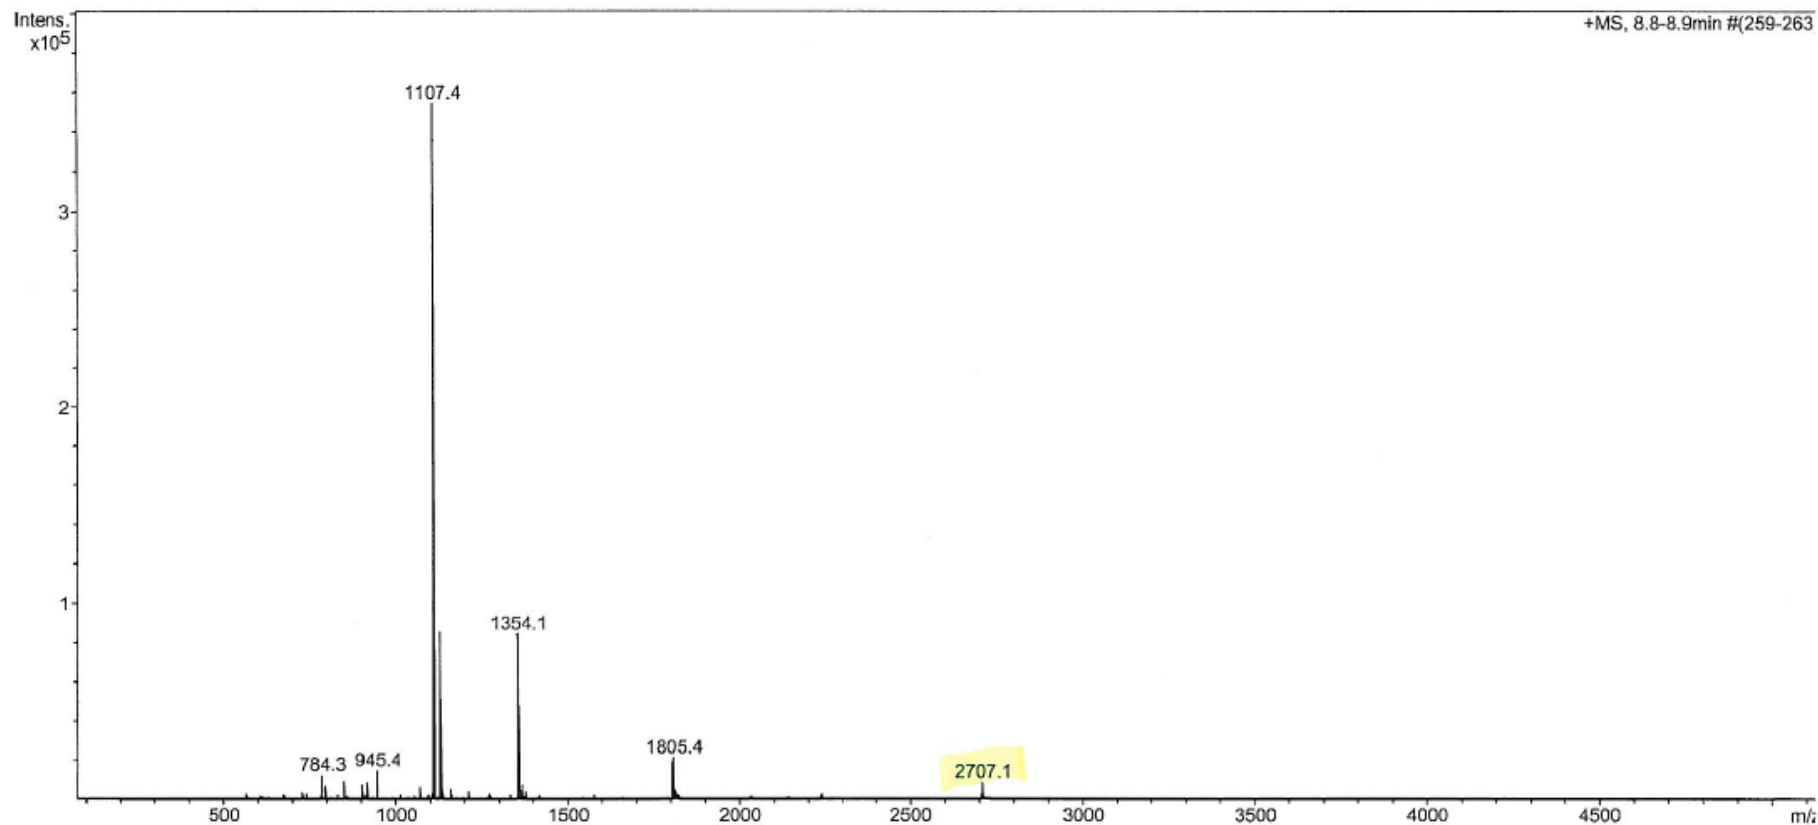

Fig. (11): HRMS of **8i** using syringe pump technique.

## School of Chemistry Mass Spectrometry Service

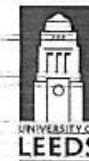

|               |                                              |                  |                     |              |          |            |        |          |          |
|---------------|----------------------------------------------|------------------|---------------------|--------------|----------|------------|--------|----------|----------|
| Comment       | EE-95                                        | Operator         | Tanya               |              |          |            |        |          |          |
| Sample Name   | 112735                                       | Acquisition Date | 15/12/2010 09:42:35 |              |          |            |        |          |          |
| Analysis Name | D:\Data\December2010\112735_1-A_7_01_12065.d |                  |                     |              |          |            |        |          |          |
| Method        | steve 200-2500 lc.m                          |                  |                     |              |          |            |        |          |          |
| Instrument    | micrOTOF                                     | Source Type      | ESI                 | Ion Polarity | Positive | Scan Begin | 50 m/z | Scan End | 2500 m/z |

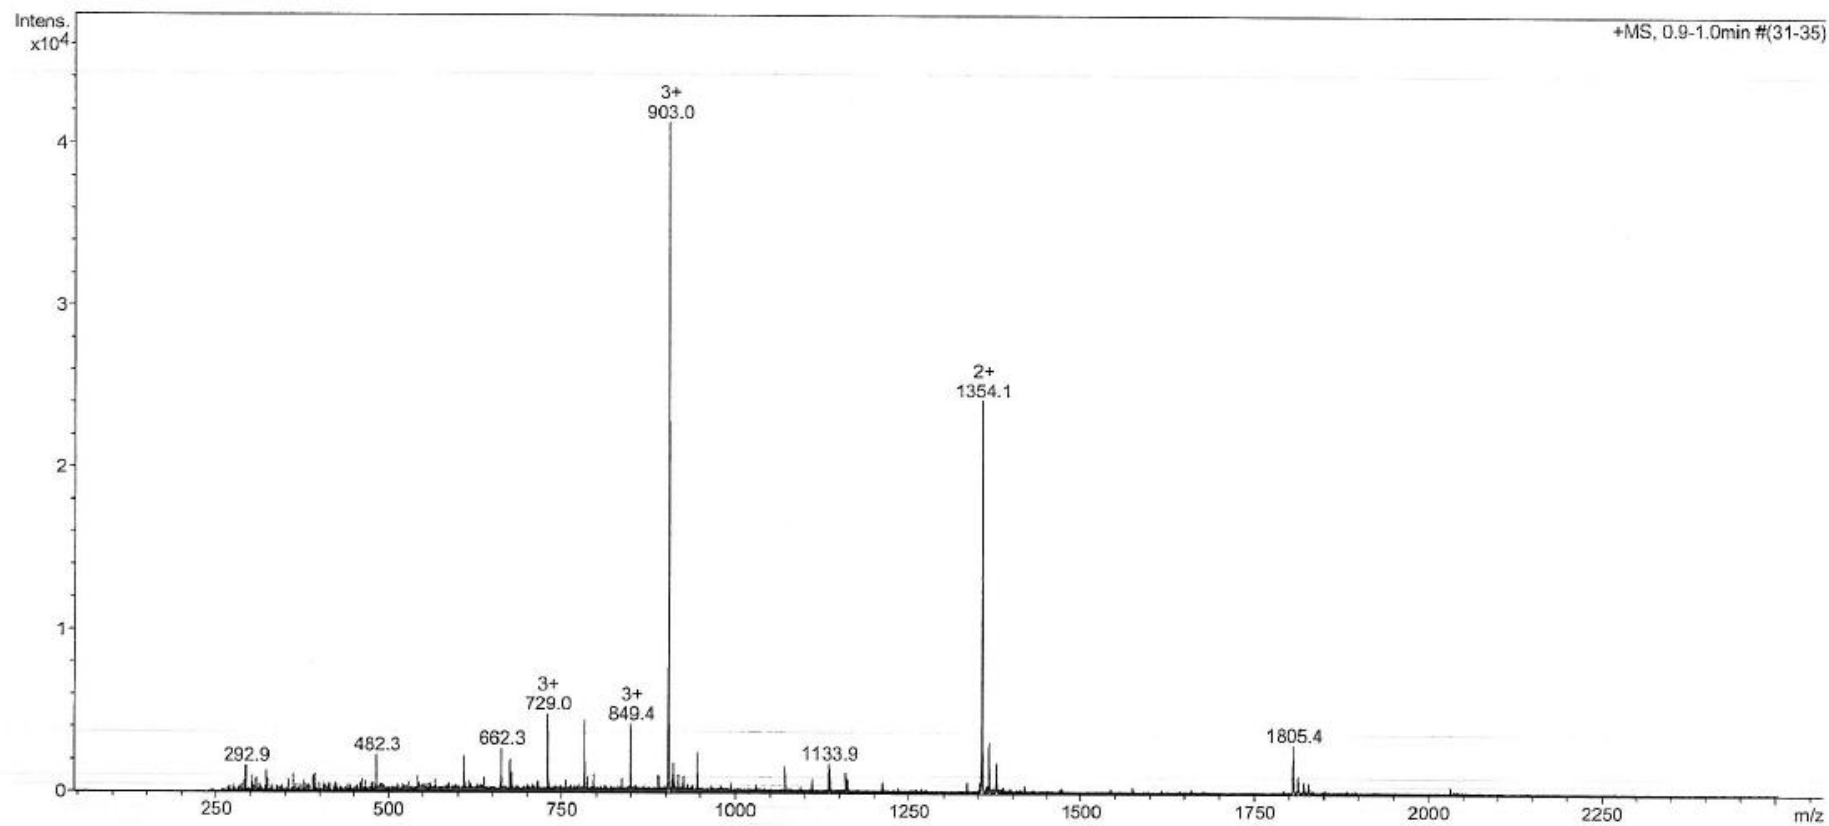

Fig. (12): HRMS of **8i** using autosampler technique.
